1 **Title: Muntjac chromosome evolution and architecture**

2

3 Authors: Austin B. Mudd[1], Jessen V. Bredeson[1], Rachel Baum[1], Dirk Hockemeyer[1,2,3],  
4 Daniel S. Rokhsar\*[1,2,3,4,5]

5

6 Affiliations:

7 [1] Department of Molecular and Cell Biology, University of California, Berkeley, California,  
8 USA

9 [2] Innovative Genomics Institute, University of California, Berkeley, California, USA

10 [3] Chan Zuckerberg Biohub, San Francisco, California, USA

11 [4] Department of Energy Joint Genome Institute, Walnut Creek, California, USA

12 [5] Molecular Genetics Unit, Okinawa Institute of Science and Technology Graduate University,  
13 Onna, Okinawa, Japan

14 \* Corresponding author

15

16 Email addresses:

17 ABM: amudd@berkeley.edu

18 JVB: jessenbredeson@berkeley.edu

19 RB: rachel\_baum@berkeley.edu

20 DH: hockemeyer@berkeley.edu

21 DSR: dsrokhsar@gmail.com

22

## 1 **Abstract**

2  
3 Despite their recent divergence, muntjac deer show striking karyotype differences. Here we  
4 describe new chromosome-scale genome assemblies for the Chinese and Indian muntjacs,  
5 *Muntiacus reevesi* (2n=46) and *Muntiacus muntjak* (2n=6/7), and analyze their evolution and  
6 architecture. We identified six fusion events shared by both species relative to the cervid  
7 ancestor and therefore present in the muntjac common ancestor, six fusion events unique to the  
8 *M. reevesi* lineage, and twenty-six fusion events unique to the *M. muntjak* lineage. One of these  
9 *M. muntjak* fusions reverses an earlier fission in the cervid lineage. Although comparative Hi-C  
10 analysis revealed differences in long-range genome contacts and A/B compartment structures,  
11 we discovered widespread conservation of local chromatin contacts between the muntjacs, even  
12 near the fusion sites. A small number of genes involved in chromosome maintenance show  
13 evidence for rapid evolution, possibly associated with the dramatic changes in karyotype.  
14 Analysis of muntjac genomes reveals new insights into this unique case of rapid karyotype  
15 evolution and the resulting biological variation.

16

17

## 18 **Keywords**

19

20 Chromosome evolution, karyotype evolution, genome, muntjac, *Muntiacus muntjak*, *Muntiacus*  
21 *reevesi*

22

23

## 1 **Background**

2

3 Rapid karyotype evolution, or chromosomal tachytely [1], has been found in various species,  
4 such as rodents [2], bears [3], and gibbons [4], and as a byproduct of chromosomal instability in  
5 cancer [5]. Perhaps the most spectacular example of rapid karyotype evolution is found in  
6 muntjacs, a genus of small deer with karyotypes ranging from  $2n=46$  for *Muntiacus reevesi* to  
7  $2n=6/7$  for female/male *Muntiacus muntjak*, respectively, with *M. muntjak* having the smallest  
8 chromosome number of any mammal [6]. Cytogenetic analysis showed that muntjac karyotype  
9 diversity arose primarily through centromere-telomere (head-tail) tandem fusions and, to a lesser  
10 extent, centromere-centromere (head-head) tandem fusions (*i.e.*, Robertsonian translocations [7])  
11 [8,9]. Importantly, independent fusions occurred in each lineage after divergence from their  
12 common ancestor, such that the  $2n=46$  *M. reevesi* karyotype does not represent an intermediate  
13 stage between the ancestral  $2n=70$  cervid karyotype and the highly reduced *M. muntjak*  
14 karyotype [10,11].

15

16 Understanding the variation of genomic architectures in muntjacs has the potential to reveal new  
17 insights into chromosome evolution [12]. We therefore set out to explore karyotype changes in  
18 muntjacs by determining the number, distribution, and timing of shared and lineage-specific  
19 fusion events. To this end, we described the first chromosome-scale assemblies of *M. muntjak*  
20 and *M. reevesi* with contiguity metrics that surpass those of earlier draft assemblies [13,14]. To  
21 infer the series of karyotype changes in muntjac, we leveraged existing assemblies of *Bos taurus*  
22 (cow) [15], *Cervus elaphus* (red deer) [16], and *Rangifer tarandus* (reindeer) [17]. In total, we  
23 characterized thirty-eight muntjac fusion events, six of which are shared by *M. muntjak* and *M.*

1 *reevesi*. The rate of twenty-six unique fusion events in the *M. muntjak* lineage over 4.9 million  
2 years represents more than an order of magnitude increase relative to the mammalian average.  
3 Although the molecular mechanism driving these karyotype changes is unknown, we found that  
4 one fusion event in the *M. muntjak* lineage reversed a chromosome fission that occurred earlier  
5 in the cervid lineage; in another case, we found that a pair of ancestral cervid chromosomes  
6 likely fused independently in the *M. muntjac* and *M. reevesi* lineages. These findings suggest that  
7 some chromosomes may be more prone to karyotype changes than others and that care should be  
8 taken in applying the parsimony principle due to the possibility of convergent change.

9  
10 We also took advantage of the extensive collinearity of the muntjac genomes to study changes in  
11 three-dimensional genome architecture that accompany chromosome fusions. Our findings  
12 suggest that while karyotype changes disrupt long-range three-dimensional genome structure,  
13 including A/B compartments, there are few changes at the local level. These analyses explore  
14 features of chromosome structure derived from the unique evolutionary history of these two  
15 karyotypically divergent species.

16  
17

## 18 **Results and discussion**

19

20 **Assembly and annotation.** To investigate the tempo and mode of muntjac chromosome  
21 evolution, we generated high-quality, chromosome-scale genome assemblies for *M. muntjak* and  
22 *M. reevesi* (Table S1) using a combination of linked-reads (10X Genomics Chromium Genome)  
23 and chromatin conformation capture (Dovetail Genomics Hi-C; Table S2, Methods). The

1 resulting assemblies each contain 2.5 Gb of contig sequence with contig N50 lengths over 200  
2 kb. In both assemblies, over 92% of contig sequence is anchored to chromosomes. Compared  
3 with the publicly available assemblies [14], the assemblies described here represent a  
4 hundredfold improvement in scaffold N50 length and severalfold improvement in contig N50  
5 length. As typical for short-read assemblies, our muntjac assemblies are largely complete with  
6 respect to genic sequences (see below) but are likely to underrepresent repetitive sequences such  
7 as pericentromeric heterochromatin and repetitive subtelomeric regions.

8  
9 The assembled chromosome numbers recapitulate the karyotypes reported in the literature ( $2n=6$   
10 for female *M. muntjak* [18] and  $2n=46$  for *M. reevesi* [19]). *M. reevesi* chromosomes were  
11 validated against previously published chromosome painting data [20]. For *M. muntjak*, we  
12 aligned 377 previously sequenced bacterial artificial chromosomes (BACs) [21–23] and, based  
13 on corresponding fluorescent *in situ* hybridization (FISH) location data, found that 360 (95%) of  
14 BACs align to the expected chromosomes. Of the 17 BACs that align to a different chromosome  
15 than expected by FISH, 16 are well-aligned to our assembly in regions of conserved colinearity  
16 among cow, red deer, and muntjac chromosomes, which suggests that the FISH-based  
17 chromosome assignments of these BACs are likely incorrect. Only one of these 17 BACs aligns  
18 to two of our assembled *M. muntjak* chromosomes, indicating a possible local misassembly or  
19 BAC construction error.

20  
21 For each muntjac genome, we annotated ~26,000 protein-coding genes based on homology with  
22 *B. taurus* [15], *Ovis aries* (sheep) [24], and *Homo sapiens* (human) [25]. Over 98% of annotated  
23 genes are functionally annotated by InterProScan [26]. From these annotations, we identified

1 19,649 one-to-one gene orthologs between the two muntjac species as well as 7,953 one-to-one  
2 gene orthologs present in the two muntjacs, *B. taurus* [15], *C. elaphus* [16], and *R. tarandus* [17].  
3 These ortholog sets were used in the evolutionary and phylogenomic analyses below (Figure 1A  
4 and 1C, Table S3, Methods). Gene set comparisons (Figure S1) show that the muntjac  
5 annotations include several thousand more conserved cervid genes than are found in the *C.*  
6 *elaphus* and *R. tarandus* annotations and demonstrate comparable completeness to *B. taurus*,  
7 supporting the completeness and accuracy of the muntjac assemblies in genic regions.

8  
9 **Comparative analysis.** In order to study sequence and karyotype evolution, we aligned the two  
10 muntjac assemblies to each other and to *B. taurus* [15] as well as *B. taurus* to *C. elaphus* [16] and  
11 *R. tarandus* [17]. The pairwise alignment of the muntjac genomes contains 2.45 Gb of contig  
12 sequence, or over 97% of the assembled contig sequence lengths, with an average identity of  
13 98.5% (excluding indels), reflecting the degree of sequence conservation between the two  
14 species and their recent divergence. In comparison, alignments of red deer, reindeer, and  
15 muntjacs to *B. taurus* contain 1.80 to 2.21 Gb of contig sequences with 92.7% to 93.2% average  
16 identity. Sequence alignments formed long runs of collinearity, and analysis of these alignments  
17 revealed the timing of fission and fusion events in each lineage (Figures 1A–B and S2A–D).

18  
19 **Chromosome evolution.** We assessed chromosome evolution in muntjacs using *B. taurus*  
20 (BTA) and *C. elaphus* (CEL) as outgroups. For convenience, we refer to chromosomal regions  
21 by their *B. taurus* (BTA) chromosome identifiers. We confirmed prior reports in literature [20]  
22 that:

- 1 1. In the last common ancestor of cow and deer, segments corresponding to the two cow  
2 chromosomes BTA26 and BTA28 were present as a single chromosome in the last common  
3 ancestor of cervids and *B. taurus*. This ancestral state, corresponding to BTA26\_28, is  
4 retained in *C. elaphus* and the muntjacs.
- 5 2. Twelve chromosomes of the cervid ancestor arose by fission of chromosomes represented by  
6 six cow chromosomes (BTA1 => CEL19 and CEL31; BTA2 => CEL8 and CEL33; BTA5  
7 => CEL3 and CEL22; BTA6 => CEL6 and CEL17; BTA8 => CEL16 and CEL29; and  
8 BTA9 => CEL26 and CEL28).
- 9 3. Although chromosomes homologous to BTA17 and BTA19 are fused in the *C. elaphus*  
10 lineage as CEL5, this fusion is unique to the *C. elaphus* lineage, and these cow chromosomes  
11 correspond to distinct ancestral cervid chromosomes.

12  
13 In the muntjacs, we found six fusions shared by *M. muntjak* and *M. reevesi* (BTA7/BTA3,  
14 BTA5prox/BTA22, BTA2dist/BTA11, BTA18/BTA25/BTA26\_28 (fusion of three ancestral  
15 chromosomes counted as two fusion events), and BTA27/BTA8dist; Figure S3). All six of these  
16 fusions shared by *M. muntjak* and *M. reevesi* were also confirmed in previous BAC-FISH  
17 analyses of *Muntiacus crinifrons*, *Muntiacus feae*, and *Muntiacus gongshanensis* [27,28]. After  
18 the divergence of *M. muntjak* and *M. reevesi*, each lineage experienced additional fusions. In the  
19 *M. reevesi* lineage, there were six fusions (BTA7\_3/BTA5dist, BTA18\_25\_26\_28/BTA13,  
20 BTA2prox/BTA9dist/BTA2dist\_11, BTA5prox\_22/BTA24, and BTA29/BTA16). In the *M.*  
21 *muntjak* lineage, the three chromosomes arose via twenty-six lineage-specific fusions:

- 22 • *M. muntjak* chromosome 1: BTA7\_3/BTA5prox\_22/BTA17/BTA2prox/BTA1dist/BTA29/  
23 BTA8prox/BTA9dist/BTA19/ BTA24/BTA23/BTA14/BTA2dist\_11,

- 1 • *M. muntjak* chromosome 2: BTA15/BTA13/BTA18\_25\_26\_28/BTA9prox/BTA20/BTA21/  
2 BTA27\_8dist/BTA5dist, and
- 3 • *M. muntjak* chromosome 3: BTAX/BTA1prox/BTA4/BTA16/BTA12/BTA6prox/BTA6dist/  
4 BTA10.

5  
6 We note that while both *M. muntjak* and *M. reevesi* karyotypes include chromosomes that arose  
7 by fusion of BTA13 and BTA18\_25\_26\_28, these events appear to have occurred independently.  
8 Consistent with our analysis, published BAC FISH mapping of *M. reevesi* against *M. crinifrons*,  
9 *M. feae*, and *M. gongshanensis* found different locations of *B. taurus* chromosomes 13 and  
10 18\_25\_26\_28 in the muntjac species [27,28]. This supports our finding that these are  
11 independent, lineage-specific fusion events.

12  
13 In total, we found thirty-eight fusion events and no fissions separating the two muntjac species  
14 (Figure 1A). All twelve of the *M. reevesi* fusions identified by our comparative analysis are  
15 confirmed by BAC-FISH [20], and seventeen of the *M. muntjak* fusions are confirmed [29]. The  
16 additional fusions found in our analysis were not assayed by prior BAC-based studies. Our  
17 results are also consistent with the BAC-FISH findings of Chi et al. [9]. The rates of karyotype  
18 changes based on fission and fusion events in muntjacs are higher than the mammalian average  
19 of 0.4 changes per million years [30]. The *M. muntjak* lineage, with six fission events and thirty-  
20 two fusion events over the past 22.8 million years since the cervid ancestor, averaged 1.7 events  
21 per million years. In the 4.9 million years since the divergence from *M. reevesi*, this rate has  
22 increased to 5.3 fusion events per million years, an order of magnitude greater than the  
23 mammalian average. The *M. reevesi* lineage, on the other hand, averaged 0.8 events per million



1 years over the past 22.8 million years, with an accelerated rate of 1.2 events per million years  
2 over the past 4.9 million years. Although the calculated nucleotide divergence and time between  
3 the two muntjac species (Figure 1A and 1C, Table S3) mirrors the evolutionary distance between  
4 humans and chimpanzees [31,32], this number of fusion events since the muntjac last common  
5 ancestor far exceeds the rate in the chimpanzee and human lineages since their respective last  
6 common ancestor (*i.e.*, a single fusion on the human lineage [33]).

7  
8 **Reversal of a cervid-specific fission in *M. muntjak*.** While analyzing the fission and fusion  
9 events, we discovered a fusion in *M. muntjak* that reverses, to the resolution of our assembly, the  
10 cervid-specific fission of the ancestral chromosome corresponding to BTA6 (Figure S4). To  
11 estimate the probability of such a reversion occurring by chance given the high rate of fusion in  
12 *M. muntjak*, we simulated a simplified model for karyotype change with four rules: (1) only one  
13 fission is allowed per chromosome; (2) all fissions occur first, followed by all fusions; (3) for  
14 each fission, a chromosome is chosen at random; and (4) for each fusion, chromosomes and  
15 chromosomal orientations are chosen at random. From a starting karyotype of  $n=29$ , representing  
16 the last common ancestor of cervids and *B. taurus* [20], we simulated the model of fissions and  
17 fusions to one million iterations per fission-fusion combination (Figure S5). The *M. muntjak*  
18 lineage, with six fissions and thirty-two fusions, had a 4% probability of at least one fusion  
19 reversing a prior fission. In comparison, the *C. elaphus* lineage, with six fissions and one fusion,  
20 had only a 0.13% probability of reversal by chance, and the *M. reevesi* lineage, with six fissions  
21 and twelve fusions, had a 1.5% chance of reversal. Given the large number of fusions in  
22 muntjacs, the probability of a chance reversal of a previous fission is small; however, it is  
23 plausible that the reversal was aided by unmodeled effects of differential chromosome fusion

1 probability arising, for example, by chromosomal proximity in the nucleus. This analysis points  
2 to the importance of having multiple outgroups (here both *B. taurus* and *C. elaphus*) in  
3 phylogenetic analyses of karyotypes.

4

5 **Changes in three-dimensional genome structure after karyotype change.** Despite the  
6 extensive fusions documented above for *M. muntjak* and *M. reevesi*, the genomes are locally  
7 very similar (98.5% identity in aligned regions and fourfold synonymous substitution rate of  
8 1.3%). Our Hi-C chromatin conformation capture data allows us to examine the impact of these  
9 rearrangements on local (*i.e.*, within a megabase along the genome) and longer (*i.e.*, 5 megabase)  
10 length scales as chromosomal segments become juxtaposed in novel ways. Focusing first on the  
11 *M. muntjak* and *M. reevesi* lineage-specific fusion sites (Tables S4-7), we note the maintenance  
12 of distinct Hi-C boundaries in several examples, such as the junction between *M. muntjak*  
13 chromosomes X and 3 at 133 Mb on chromosome 3\_X. Other fusion sites, however, show no  
14 notable difference from the rest of the genome in *M. muntjak*. As expected, *M. reevesi* shows a  
15 clear distinction between intra- and inter-chromosomal contacts, including across fusion sites in  
16 *M. muntjak* (Figure 2). To quantify the chromatin changes at these fusion sites, we divided the  
17 genomes into 1 Mb bins and compared normalized inter-bin Hi-C contact between bins 5 Mb  
18 apart in the two species, using the *M. muntjak* assembly as the backbone for comparison (Figure  
19 S7). Confirming the initial visual analysis, we found that most bins containing a fusion site have  
20 fewer long-range chromatin contacts in *M. reevesi* (averaging  $0.16 \pm 0.09$  normalized contacts  
21 per bin) compared with *M. muntjak* (averaging  $0.62 \pm 0.35$  normalized contacts per bin), though  
22 we identified bins with few contacts in both species (Figure S7).

23

1 In order to test whether differences are present at a more local level, we next compared  
2 normalized 1 Mb intra-bin Hi-C contacts between the two species, again using the *M. muntjak*  
3 assembly as the backbone for comparison. We found that most of the chromatin contacts are  
4 consistent between the two muntjacs, including all but three of the bins containing fusion sites  
5 (Figures 3A and S6). Several regions, however, show distinctive variation in chromatin contacts  
6 between the two species: the X chromosome and two regions on *M. muntjak* chromosome 1  
7 (186–355 and 615–630 Mb). Since our sequenced *M. reevesi* sample is male [10] while the  
8 sequenced *M. muntjak* sample is female [34], we expect a difference in chromatin contacts on the  
9 X chromosome, a finding that is further supported by analysis of copy number across the genome  
10 using the 10X Genomics linked-read data (Figure 3B). From this copy number analysis, we also  
11 hypothesize that the two regions on *M. muntjak* chromosome 1 (186–355 and 615–630 Mb) are a  
12 haplotype-specific duplication and a haplotype-specific deletion, respectively, which would  
13 explain the difference in chromatin signal between the two muntjacs (Figure 3C–D). Although  
14 the inter-bin analysis identified long-range chromatin changes between sites 5 Mb apart, our  
15 quantitative comparison of 1 Mb intra-bin chromatin contacts found substantial chromatin  
16 conservation between the genome assemblies, including nearly all of the fusion sites. This  
17 conclusion is further supported by intra-bin analysis with 100 kb bins (Figure S8).

18  
19 On a multi-megabase length scale, mammalian chromosomes can be subdivided into alternating  
20 A/B compartments based on intra-chromosome contacts; these compartments correspond to open  
21 and closed chromatin, respectively, and differ in gene density and GC content [35]. To test  
22 whether these compartments are conserved or disrupted by fusions, we computed the A/B  
23 chromatin compartment structures for *M. muntjak* and *M. reevesi* from the Hi-C data, again using

1 the *M. muntjak* assembly as the backbone for comparison. We found that, in general,  
2 compartment boundaries are not well conserved between the muntjacs (Figure S9). Specifically,  
3 for A/B compartments larger than 3 Mb (*i.e.*, containing more than three 1 Mb bins), only 17  
4 compartments were completely conserved between the two species, out of 221 A/B  
5 compartments analyzed in *M. muntjak* and 161 in *M. reevesi*. We found that many of the  
6 compartments in *M. reevesi* are subdivided into multiple compartments in *M. muntjak*.  
7 Combining our analysis of A/B compartments and the chromatin contacts, we found that the  
8 extensive set of fusions in the *M. muntjac* lineage altered three-dimensional genome structure at  
9 the multi-megabase scale while still maintaining conservation at the local level. These large-  
10 scale chromatin changes accompanying karyotype change must have only limited effects on the  
11 underlying gene expression, since the two muntjac species can produce sterile hybrid offspring  
12 [36]. Similar uncoupling between genome topology and gene expression has been observed in  
13 *Drosophila melanogaster* [37].

14  
15 **Genic evolution accompanying rapid karyotype change.** Finally, we searched for genic  
16 differences between muntjac that may have accompanied rapid karyotype evolution. These  
17 could, for example, be mutations that led to dysfunctional chromosome maintenance and thus  
18 triggered the rapid occurrence of multiple fusions, such as by destabilization of telomeres. More  
19 subtly, these genic changes could have occurred as a response to chromosomal change; for  
20 example, the dramatic reduction in the number of telomeres following large-scale fusion could  
21 be permissive for mutations that make telomere maintenance less efficient. Our survey of gene  
22 and gene family differences between muntjacs were suggestive but ultimately inconclusive. In  
23 particular, we found evidence for positive selection of centromere-associated proteins CENPQ

1 and CENPV and meiotic double strand break protein MEI4 as well as the expansion of the  
2 nucleosome-binding domain-containing HMG14 family in *M. muntjak*.

3

4

## 5 **Conclusions**

6

7 We present here new chromosome-scale assemblies of two muntjac deer that differ dramatically  
8 in karyotype, despite only limited sequence change, after ~4.9 million years of divergence.  
9 Analysis of these new assemblies revealed multiple changes in the underlying chromosome  
10 structure, including variation in the A/B compartments despite maintenance of local (*i.e.*, sub-  
11 megabase) three-dimensional genome contacts. One of the chromosome fusions reverses an  
12 earlier chromosome fission to the resolution of our assemblies, with the two events being  
13 separated by more than eight million years. Several chromosome maintenance associated  
14 proteins show accelerated evolution in *M. muntjak*, although functional studies will be required  
15 to determine any possible causal link to rapid karyotype change. Future studies will use these  
16 assemblies to resolve the nature of the fusion sites and to better understand the biological  
17 mechanisms related to chromosome fissions and fusions in muntjac.

18

19

## 20 **Methods**

21

22 **DNA extraction and sequencing.** High molecular weight DNA was extracted, as previously  
23 described [38], from fibroblast cell lines obtained from the University of Texas Southwestern

1 Medical Center for *M. muntjak* (female) [34] and the University of Cambridge for *M. reevesi*  
2 (male) [10]. A 10X Genomics Chromium Genome library [39] was prepared for each species by  
3 the DNA Technologies and Expression Analysis Cores at the University of California Davis  
4 Genome Center and sequenced on the Illumina HiSeq X by Novogene Corporation. A Hi-C  
5 chromatin conformation capture library was also prepared for each species using the Dovetail  
6 Genomics Hi-C library preparation kit and sequenced on the Illumina HiSeq 4000 by the Vincent  
7 J. Coates Genomics Sequencing Laboratory at the University of California Berkeley.

8  
9 **Shotgun assembly.** 10X Genomics linked-reads were assembled with Supernova (v2.0.1) [39].  
10 Putative archaeal, bacterial, viral, and vector contamination was identified and removed by  
11 querying the assemblies using BLAST+ (v2.6.0) [40] against the respective RefSeq and UniVec  
12 databases, removing sequences with at least 95% identity, E-value less than 1E-10, and hits  
13 aligning to more than half the scaffold size or 200 bases, using custom script general\_decon.sh  
14 (v1.0). Putative mitochondrial sequence was also identified and removed by querying the  
15 assemblies using BLAST+ (v2.6.0) [40] against their respective mitochondrial assemblies (NCBI  
16 NC\_004563.1 [41] and NC\_004069.1 [42]), removing sequence with at least 99% identity and E-  
17 value less than 1E-10, using custom script mt\_decon.sh (v1.0). 71 scaffolds totaling 836 kb were  
18 removed from the *M. muntjak* assembly, and 36 scaffolds totaling 9 kb were removed from the  
19 *M. reevesi* assembly.

20  
21 **Chromosomal assembly.** Hi-C reads were aligned to each assembly with Juicer (v1.5.4-71-  
22 gd3ee11b) [43]. A preliminary round of Hi-C-based scaffolding was performed with 3D-DNA  
23 (commit 745779b) [44], and residual redundancy due to split haplotypes was manually filtered

1 through visualization of the Hi-C contact map in Juicebox (v1.9.0) [45], removing the smaller of  
2 any pair of duplicate scaffolds. This process removed 1.04 Gb of sequence from the *M. muntjak*  
3 assembly and 25 Mb of sequence from the *M. reevesi* assembly. The remaining scaffolds were  
4 organized into chromosomes by realigning the Hi-C reads to the deduplicated assembly with  
5 Juicer (v1.5.4-71-gd3ee11b) [43], ordering and orienting scaffolds into chromosomes with 3D-  
6 DNA (commit 745779b) [44], and then manually correcting using Juicebox (v1.9.0) [45]. After  
7 correction, gaps in the assembly were filled with adapter-trimmed 10X Genomics data using  
8 custom script trim\_10X.py (v1.0) and Platanus (v1.2.1) [46].

9  
10 **Final assembly release and validation.** Scaffolds smaller than 1 kb in the gap-filled assembly  
11 were removed with seqtk seq (v1.3-r106; <https://github.com/lh3/seqtk>), and chromosomes and  
12 scaffolds were numbered in order of size using SeqKit (v0.7.2-dev) [47]. X chromosomes were  
13 later renamed based on alignment with *B. taurus* [15]. Chromosomes in both species were  
14 oriented arbitrarily. For *M. reevesi*, the chromosome numbering in the assembly may differ from  
15 prior BAC-based studies. As *B. taurus* chromosome numbering is universally recognized, the  
16 extensive genomic collinearity of cervids, including both muntjacs, with cow provides a standard  
17 method of referencing homologous segments.

18  
19 To validate the *M. muntjak* assembly, sequenced BACs [21–23] were aligned to it with BWA  
20 (v0.7.17-r1188) [48], and primary alignments were checked against the corresponding FISH  
21 locations, excluding unaligned BACs or those aligned to unplaced scaffolds.

22

1 **Annotation and homology analysis.** Repetitive elements were identified and classified with  
2 RepeatModeler (v1.0.11) [49] and combined for each species with ancestral Cetartiodactyla  
3 repeats from RepBase (downloaded Nov 8, 2018) [50]. The assemblies were then soft masked  
4 with RepeatMasker (v4.0.7) [51]. The assemblies were annotated using Gene Model Mapper  
5 (v1.5.3) [52] and BLAST+ (v2.6.0) [40] with the following assemblies and annotations from  
6 Ensembl release 94 [53] as input evidence: *B. taurus* (Sep 2011 genebuild of  
7 GCA\_000003055.3) [15], *H. sapiens* (Jul 2018 genebuild of GCA\_000001405.27) [25], and *O.*  
8 *aries* (May 2015 genebuild of GCA\_000298735.1) [24]. Coding nucleotide and peptide  
9 sequences were extracted using gff3ToGenePred and genePredToProt from the UCSC Genomics  
10 Institute (binaries downloaded 2019-03-05) [54] using custom script postGeMoMa.py (v1.0),  
11 and functional annotation was run with InterProScan (v5.34-73.0) [26].

12  
13 Pairwise gene homology of the two muntjac annotations as well as total gene homology of the  
14 two muntjac, *B. taurus* (Ensembl release 94 Sep 2011 genebuild of GCA\_000003055.3) [15,53],  
15 *C. elaphus* (publication genebuild of GCA\_002197005.1) [16], and *R. tarandus* (release date  
16 2017-10-17 genebuild) [17] annotations were analyzed with OrthoVenn [55] using the default E-  
17 value of 1e-5 and inflation value of 1.5. One-to-one orthologous muntjac genes were extracted  
18 from the pairwise OrthoVenn output, and Yang-Nielsen synonymous and nonsynonymous  
19 substitution rates were calculated with the Ks calculation script (commit 78dda1e;  
20 [https://github.com/tanghaibao/bio-pipeline/tree/master/synonymous\\_calculation](https://github.com/tanghaibao/bio-pipeline/tree/master/synonymous_calculation)) using  
21 ClustalW2 (v2.1) [56] and PAML (v4.7) [57]. Gene gain was identified from the full gene  
22 homology OrthoVenn output, requiring that the number of *M. muntjak* genes in an OrthoVenn  
23 cluster be greater than the number of genes found in any other analyzed species. Putative gene



1 names of the results were extracted from the BLAST+ (v2.6.0) [40] best hit to the *H. sapiens*  
2 proteome from UniProt [58].

3

4 **Comparative analysis.** The two muntjac assemblies were aligned to each other with cactus  
5 (v1590-ge4d0859) [59]. After removing any ambiguous sequence with seqtk randbase (v1.3-  
6 r106; <https://github.com/lh3/seqtk>), the muntjac assemblies, *C. elaphus* (GCA\_002197005.1)  
7 [16], and *R. tarandus* (release date 2017-10-17 version) [17] were each also aligned pairwise  
8 against *B. taurus* (GCA\_000003055.3) [15] with cactus (v1590-ge4d0859) [59]. Using custom  
9 script `cactus_filter.py` (v1.0), all pairwise output HAL alignment files were converted into PSL  
10 format with `halLiftover` (v200-gf7287c8) [60]. Using tools from the UCSC Genomics Institute  
11 (binaries downloaded 2019-03-05) [54] unless noted otherwise, the PSL files were filtered and  
12 converted with `pslMap`, `axtChain`, `chainPreNet`, `chainCleaner` (commit `aacca59`) [61], `chainNet`,  
13 `netSyntenic`, `netToAxt`, `axtSort`, and `axtToMaf`. Runs of collinearity were extracted from each  
14 pairwise MAF file by linking together local alignment blocks where the species 1 and species 2  
15 locations, correspondingly, are in the same orientation and are neighboring in their respective  
16 genomes without intervening aligned sequence from elsewhere in the genomes. The pairwise  
17 MAF files from the alignments against *B. taurus* were also merged with ROAST/MULTIZ  
18 (v012109) [62], using the phylogenetic topology extracted with Newick utilities (v1.6) [63] from  
19 a consensus tree of the species from 10kTrees [64], and sorted with `last` (v912) [65].

20

21 **Phylogeny.** From the one-to-one orthologous genes of all five species identified by OrthoVenn,  
22 codons with potential four-fold degeneracy were extracted from the *B. taurus* Ensembl release 94  
23 Sep 2011 genebuild, excluding codons spanning introns, using custom script `4Dextract.py` (v1.0).

1 Using the ROAST-merged MAF file with *B. taurus* as reference, the corresponding codons were  
2 identified in the other four species, checking for corresponding amino acid conservation and  
3 excluding any codons that span two alignment blocks in the MAF file. The output fasta file  
4 containing four-fold degenerate bases was converted in phylip format with BeforePhylo (commit  
5 0885849; <https://github.com/qiyunzhu/BeforePhylo>) and then analyzed with RAxML (v8.2.11)  
6 [66] using the GTR+Gamma model of substitution with outgroup *B. taurus*. As previously  
7 described [67], the divergence time confidence intervals from TimeTree [68] for all nodes except  
8 the outgroup *B. taurus* node were input into MEGA7 (v7.0.26) [69] using the Reltime method  
9 [70] and the GTR+Gamma model to create a time tree. To confirm the resulting times, the time  
10 calculated for the outgroup *B. taurus* node was verified in the literature [71].

11

12 **Chromatin conformation analysis.** Hi-C reads from both species were aligned to the *M.*  
13 *muntjak* assembly with Juicer (v1.5.4-71-gd3ee11b) [43], and KR normalized intrachromosomal  
14 Hi-C contact matrices were extracted with Juicer Tools (v1.5.4-71-gd3ee11b) [43] at 1 Mb  
15 resolution. A sliding window-based localized principle component analysis (PCA) was used to  
16 call A/B compartment structure using custom script call-compartments.R  
17 (<https://bitbucket.org/bredeson/artisanal>). Localization of the PCA along the diagonal of the  
18 Pearson correlation matrix (forty 1 Mb windows with a step of twenty) mitigates confounding  
19 signal from large-scale intrachromosomal interarm contacts and amplifies compartment signal.  
20  
21 Hi-C contacts from the Juicer (v1.5.4-71-gd3ee11b) [43] merged\_nodups.txt output file were  
22 split into 1 Mb and 100 kb bins using custom scripts HiCbins\_1Mb.py and HiCbins\_100kb.py,

1 respectively. Intra-bin and inter-bin Hi-C contacts were extracted and normalized based on the  
2 average number of contacts per bin for each species.

3  
4 **Copy number analysis.** To explore the three regions with variation in chromatin contacts,  
5 adapter trimmed 10X Genomics data for each species was aligned to the *M. muntjak* assembly  
6 with BWA (v0.7.17-r1188) [48]. Alignment depth was extracted with SAMtools (v1.6) [72], and  
7 copy number was calculated from the average alignment depth per 1 Mb bin for each species.

## 10 **Abbreviations**

11  
12 *B. taurus*: *Bos taurus*; *C. elaphus*: *Cervus elaphus*; *H. sapiens*: *Homo sapiens*; *M. crinifrons*:  
13 *Muntiacus crinifrons*; *M. feae*: *Muntiacus feae*; *M. gongshanensis*: *Muntiacus gongshanensis*;  
14 *M. muntjak*: *Muntiacus muntjak*; *M. reevesi*: *Muntiacus reevesi*; *O. aries*: *Ovis aries*; *R.*  
15 *tarandus*: *Rangifer tarandus*; bacterial artificial chromosome: BAC; fluorescent *in situ*  
16 hybridization: FISH; proximal: prox; distal: dist; principle component analysis: PCA

## 19 **Declarations**

20  
21 **Ethics approval and consent to participate.** Not applicable

22  
23 **Consent for publication.** Not applicable

1  
2  
3  
4  
5  
6  
7  
8  
9  
10  
11  
12  
13  
14  
15  
16  
17  
18  
19  
20  
21  
22  
23

**Availability of data and materials.** The assemblies, annotations, and raw data for *M. muntjak* and *M. reevesi* were deposited at NCBI under BioProjects PRJNA542135 and PRJNA542137, respectively. Supporting files for the repeat and gene annotations are available at <https://doi.org/10.6078/D1KT16>. Unless otherwise stated, custom code used in this study is available at <https://github.com/abmudd/Assembly>.

**Competing interests.** DSR is a member of the Scientific Advisory Board of and a minor shareholder in Dovetail Genomics, which developed the Hi-C library preparation kit used in this study and performed quality control analyses on the Hi-C libraries.

**Funding.** This study was supported by NIH grants R01GM086321 and R01HD080708 to DSR and R01CA196884 to DH. ABM was supported by NIH grants T32GM007127 and T32HG000047 and a David L. Boren Fellowship. RB was supported by NIH grant T32GM066698. DH is a Pew-Stewart Scholar for Cancer Research supported by the Pew Charitable Trusts and the Alexander and Margaret Stewart Trust. DH and DSR are Chan Zuckerberg Biohub Investigators. This work used the Vincent J. Coates Genomics Sequencing Laboratory at the University of California Berkeley, supported by NIH grant S10OD018174, and the DNA Technologies and Expression Analysis Cores at the University of California Davis Genome Center, supported by NIH grant S10OD010786. This research used the National Energy Research Scientific Computing Center, a Department of Energy Office of Science User Facility supported by contract number DE-AC02-05CH11231.

1 **Authors' contributions.** ABM assembled and annotated the genomes, completed the  
2 bioinformatic analyses, and wrote the manuscript. JVB assisted with the bioinformatic analyses  
3 and script development. RB prepared the Hi-C libraries. DH coordinated the cell line  
4 acquisitions, extracted the DNA, and prepared the Hi-C libraries. DH and DSR provided  
5 scientific leadership of the project and wrote the manuscript. All authors reviewed the  
6 manuscript.

7  
8 **Acknowledgements.** We thank Jerry Shay and Woody Wright for providing the *M. muntjak* cell  
9 line; Malcolm Ferguson-Smith and Fengtang Yang for providing the *M. reevesi* cell line; Karen  
10 Lundy and the Functional Genomics Laboratory at the University of California Berkeley for  
11 running quality control on the extracted DNA; Dovetail Genomics for providing the Hi-C library  
12 preparation kit and running quality control on the Hi-C libraries; Shana McDevitt and the  
13 Vincent J. Coates Genomics Sequencing Laboratory at the University of California Berkeley for  
14 sequencing the Hi-C libraries; Jessica Lyons for coordinating the preparation and sequencing of  
15 the *M. muntjak* 10X Genomics library; Diana Burkart-Waco and the DNA Technologies and  
16 Expression Analysis Cores at the University of California Davis Genome Center for preparing  
17 the 10X Genomics libraries; Novogene Corporation for sequencing the 10X Genomics libraries;  
18 and Gary Karpen for providing comments on the manuscript.

19

20

21 **Figures and tables**

22

1 **Figure 1. Evolutionary and phylogenomic analyses.** [A] The phylogenetic tree of the five  
2 analyzed species, calculated from four-fold degenerate sites and divergence time confidence  
3 intervals, was visualized with FigTree (commit 901211e; <https://github.com/rambaut/figtree>).  
4 The tree denotes the ancestral karyotype at each node and the six branches with fission and  
5 fusion events relative to the ancestral karyotype. The lack of fissions or fusions on the *R.*  
6 *tarandus*-specific branch as well as the timings of the cervid-specific and *B. taurus*-specific  
7 fissions are derived from literature [20]. [B] Plot with `jcvi.graphics.karyotype` (v0.8.12;  
8 <https://github.com/tanghaibao/jcvi>) using runs of collinearity containing at least 25 kb of aligned  
9 sequence between *B. taurus*, *C. elaphus*, *M. reevesi*, and *M. muntjak*. *R. tarandus* was excluded,  
10 as it is not a chromosome-scale assembly. [C] Pairwise distances in substitutions per four-fold  
11 degenerate site extracted from the RAxML (v8.2.11) [66] phylogenetic tree using Newick  
12 utilities (v1.6) [63] are shown from reference genome *M. muntjak*.

13  
14 **Figure 2. Chromosomal Hi-C contact maps.** Visualization of the *M. muntjak* chromosomes'  
15 Hi-C contact map (bottom left) and the *M. reevesi* chromosomes' Hi-C contact map (top right)  
16 using the *M. muntjak* assembly as the reference in Juicebox (v1.9.0) [45]. The blue lines  
17 demarcate the boundaries of the three *M. muntjak* chromosomes.

18  
19 **Figure 3. Evaluation of inter-chromosomal contacts.** [A] 1 Mb intra-bin Hi-C contacts for *M.*  
20 *muntjak* (y axis) vs. *M. reevesi* (x axis) with the bins containing the *M. muntjak* lineage-specific  
21 fusion sites (Table S6), chromosome ends, the X chromosome, the potential *M. muntjak*  
22 haplotype-specific duplication, and the potential *M. muntjak* haplotype-specific deletion colored.  
23 The expected result of conserved Hi-C contacts is represented with a dashed red line. For fusion

1 site ranges spanning two bins, the bin containing the majority of the fusion site range was  
2 deemed to be the fusion site bin. Copy number was calculated from normalized coverage of  
3 adapter-trimmed 10X Genomics linked-reads for three regions with variation in the chromatin  
4 contacts: [B] the X. chromosome, [C] the potential *M. muntjak* haplotype-specific duplication,  
5 and [D] the potential *M. muntjak* haplotype-specific deletion, with the copy number of *M.*  
6 *muntjak* in blue and *M. reevesi* in orange.

7  
8 **Figure S1.** [A] Venn diagram of gene homology between the two muntjac annotations, *B. taurus*  
9 (Ensembl release 94 Sep 2011 genebuild of GCA\_000003055.3) [15,53], *C. elaphus* (publication  
10 genebuild of GCA\_002197005.1) [16], and *R. tarandus* (release date 2017-10-17 genebuild) [17]  
11 annotations analyzed with OrthoVenn [55] and [B] the occurrence table of gene homology  
12 between these species reanalyzed with OrthoVenn2 [73] for visualization purposes. In the  
13 occurrence table, the green and grey represent the presence or absence, respectively, of that  
14 species in the OrthoVenn 2 clustering. The number of clusters and proteins are provided for all  
15 species combinations.

16  
17 **Figure S2.** Circos (v0.69-6) [74] plots with runs of collinearity containing at least 25 kb of  
18 aligned sequence between [A] *B. taurus* (left, Bt) and *C. elaphus* (right, Ce), [B] *B. taurus* (left,  
19 Bt) and *M. muntjak* (right, Mm), [C] *B. taurus* (left, Bt) and *M. reevesi* (right, Mr), and [D] *M.*  
20 *reevesi* (left, Mr) and *M. muntjak* (right, Mm).

21  
22 **Figure S3.** Circos (v0.69-6) [74] plots using runs of collinearity containing at least 25 kb of  
23 aligned sequence between [A] *B. taurus* (left, Bt) and *M. muntjak* (right, Mm) and [B] *B. taurus*

1 (left, Bt) and *M. reevesi* (right, Mr) specifying the six shared muntjac fusions: 7/3 (purple),  
2 5prox/22 (red), 2dist/11 (green), 18/25/26\_28 (blue), and 27/8dist (orange).

3  
4 **Figure S4.** Circos (v0.69-6) [74] plots using runs of collinearity containing at least 25 kb of  
5 aligned sequence between [A] *B. taurus* (left, Bt) and *C. elaphus* (right, Ce) with the fission of *B.*  
6 *taurus* chromosome 6 in purple; [B] *B. taurus* (left, Bt) and *M. muntjak* (right, Mm) with the  
7 fission-fusion reversal of *B. taurus* chromosome 6 in orange; and [C] *B. taurus* (left, Bt) and *M.*  
8 *reevesi* (right, Mr) with the fission of *B. taurus* chromosome 6 in green.

9  
10 **Figure S5.** Heatmap of probabilities where at least one fusion reverses a prior fission modeled to  
11 one million iterations for each possible scenario from a starting karyotype of n=29 using custom  
12 script run\_fission\_fusion.sh (v1.0).

13  
14 **Figure S6.** Using a bin size of 1 Mb and the *M. muntjak* assembly as the reference, normalized  
15 intra-bin Hi-C contacts for *M. muntjak* (blue) and *M. reevesi* (orange) at each position on [A]  
16 chromosome 1, [B] chromosome 2, and [C] chromosome 3\_X. The difference of *M. muntjak*  
17 contacts minus *M. reevesi* contacts is displayed in yellow.

18  
19 **Figure S7.** 1 Mb inter-bin Hi-C contacts between bins 5 Mb apart for *M. muntjak* (y axis) vs. *M.*  
20 *reevesi* (x axis) with the inter-bin contacts that span across but do not include the *M. muntjak*  
21 lineage-specific fusion sites (Table S6) colored black. The expected result of conserved Hi-C  
22 contacts is represented with a dashed red line.

23



1 **Figure S8.** 100 kb intra-bin Hi-C contacts for *M. muntjak* (y axis) vs. *M. reevesi* (x axis) with the  
 2 bins containing the *M. muntjak* lineage-specific fusion sites (Table S6) colored black. The  
 3 expected result of conserved Hi-C contacts is represented with a dashed red line. For fusion site  
 4 ranges spanning two bins, the bin containing the majority of the fusion site range was deemed to  
 5 be the fusion site bin. For fusion site ranges spanning three or more bins, the middle 100 kb  
 6 bin(s) was deemed to be the fusion site bin(s).

7  
 8 **Figure S9.** Using the *M. muntjak* assembly as reference, identification of A/B compartment  
 9 boundaries for *M. muntjak* (blue) and *M. reevesi* (orange) based on PCA 1 eigenvalues with call-  
 10 compartments.R.

11  
 12 **Table S1.** Summary of genome assembly. Statistics were calculated using `assemblathon_stats.pl`  
 13 (`commit d1f044b`) [75] and `GenomeTools` (v1.5.9) [76].

| Genomic feature                     | <i>M. muntjak</i> | <i>M. reevesi</i> |
|-------------------------------------|-------------------|-------------------|
| Total scaffold length, bp           | 2,573,529,099     | 2,579,575,442     |
| Number of scaffolds                 | 25,651            | 29,705            |
| Scaffold N50 length, bp             | 682,452,208       | 94,101,870        |
| Total contig length, bp             | 2,518,738,577     | 2,514,747,046     |
| Number of contigs                   | 49,270            | 53,090            |
| Contig N50 length, bp               | 215,534           | 225,142           |
| Contigs sequence in chromosomes, %  | 95.06             | 92.93             |
| Contig GC content, %                | 41.59             | 41.59             |
| Masked contig repeat sequence, %    | 40.33             | 40.06             |
| Number of genes                     | 25,753            | 26,054            |
| Genes with functional annotation, % | 98.11             | 98.15             |
| Average number of exons per gene    | 7.83              | 7.77              |
| Median gene size, aa                | 328               | 326               |

|                        |     |     |
|------------------------|-----|-----|
| Median exon size, bp   | 124 | 124 |
| Median intron size, bp | 921 | 911 |

1

2 **Table S2.** DNA sequencing generated for the genome assembly.

| Species                                         | Library type                 | Total number of reads | Total bases sequenced |
|-------------------------------------------------|------------------------------|-----------------------|-----------------------|
| <i>M. muntjak</i> (NCBI BioProject PRJNA542135) | 10X Genomics Chromium Genome | 768,921,264           | 115,338,189,600       |
|                                                 | Dovetail Genomics Hi-C       | 521,749,568           | 78,784,184,768        |
| <i>M. reevesi</i> (NCBI BioProject PRJNA542137) | 10X Genomics Chromium Genome | 696,864,964           | 104,529,744,600       |
|                                                 | Dovetail Genomics Hi-C       | 530,002,086           | 80,030,314,986        |

3

4 **Table S3.** Pairwise nucleotide divergence based on four-fold degeneracy between the examined  
5 species.

| Species            | <i>B. taurus</i> | <i>C. elaphus</i> | <i>M. muntjak</i> | <i>M. reevesi</i> |
|--------------------|------------------|-------------------|-------------------|-------------------|
| <i>C. elaphus</i>  | 0.0549632        | –                 | –                 | –                 |
| <i>M. muntjak</i>  | 0.0606332        | 0.0266608         | –                 | –                 |
| <i>M. reevesi</i>  | 0.0598953        | 0.0259229         | 0.0130037         | –                 |
| <i>R. tarandus</i> | 0.0591649        | 0.0298125         | 0.0354825         | 0.0347446         |

6

7 **Table S4.** Locations of six cervid-specific fissions on the *B. taurus* genome assembly.

| <i>B. taurus</i> chromosome | Using runs of collinearity from <i>C. elaphus</i> | Using runs of collinearity from <i>M. muntjak</i> | Using runs of collinearity from <i>M. reevesi</i> |
|-----------------------------|---------------------------------------------------|---------------------------------------------------|---------------------------------------------------|
| BTA1                        | 58,941,477 – 58,978,602                           | 57,645,593 – 57,778,258                           | 57,645,547 – 57,746,127                           |
| BTA2                        | 93,282,776 – 93,424,724                           | 79,668,309 – 79,719,766                           | 79,668,935 – 79,719,765                           |
| BTA5                        | 70,623,938 – 70,699,763                           | 57,880,818 – 58,822,584                           | 57,880,818 – 60,196,482                           |
| BTA6                        | 63,301,740 – 63,370,450                           | Fusion reversal                                   | 68,435,554 – 68,455,313                           |
| BTA8                        | 64,071,291 – 64,114,095                           | 67,266,180 – 67,499,444                           | 67,369,805 – 67,497,566                           |
| BTA9                        | 63,670,677 – 64,013,115                           | 64,824,832 – 65,087,945                           | 64,824,832 – 65,087,945                           |

1  
 2 **Table S5.** Locations of shared fusion events in the *M. muntjak* and *M. reevesi* genome assembly  
 3 using runs of collinearity from *B. taurus*.

| <i>B. taurus</i> fused chromosomes | <i>M. muntjak</i>                   | <i>M. reevesi</i>               |
|------------------------------------|-------------------------------------|---------------------------------|
| 7/3                                | Chr1: 103,142,901 – 103,201,151     | Chr1: 103,650,999 – 103,852,521 |
| 5prox/22                           | Chr1: 267,859,762 – 267,926,350     | Chr4: 52,627,734 – 52,781,577   |
| 2dist/11                           | Chr1: 1,006,153,244 – 1,006,638,886 | Chr3: 100,711,306 – 101,302,993 |
| 18/25                              | Chr2: 216,351,804 – 216,390,051     | Chr2: 210,159,178 – 210,200,937 |
| 25/26                              | Chr2: 256,956,082 – 257,281,016     | Chr2: 169,793,458 – 170,063,149 |
| 26_28 ( <i>B. taurus</i> fission)  | Chr2: 305,072,202 – 305,072,202     | Chr2: 121,918,267 – 122,082,397 |
| 27/8dist                           | Chr2: 580,274,743 – 582,942,905     | Chr9: 40,769,993 – 43,560,918   |

4  
 5 **Table S6.** Locations of twenty-six unique fusion events in the *M. muntjak* genome assembly  
 6 derived from one-to-one orthologs between *M. muntjak* and *M. reevesi* and then refined using  
 7 runs of collinearity from *B. taurus* and *M. reevesi* against *M. muntjak*.

| <i>M. muntjak</i> chromosome | <i>M. muntjak</i> start | <i>M. muntjak</i> end |
|------------------------------|-------------------------|-----------------------|
| Chromosome 1                 | 215,667,096             | 215,740,550           |
| Chromosome 1                 | 326,596,489             | 326,664,606           |
| Chromosome 1                 | 394,376,597             | 394,423,120           |
| Chromosome 1                 | 468,279,958             | 468,421,169           |
| Chromosome 1                 | 562,054,424             | 562,154,407           |
| Chromosome 1                 | 609,147,303             | 609,442,186           |
| Chromosome 1                 | 669,798,392             | 669,917,570           |
| Chromosome 1                 | 707,332,274             | 707,411,696           |
| Chromosome 1                 | 767,481,614             | 767,858,594           |
| Chromosome 1                 | 825,563,679             | 825,664,460           |
| Chromosome 1                 | 875,352,976             | 875,473,556           |
| Chromosome 1                 | 952,277,739             | 952,439,995           |
| Chromosome 2                 | 76,554,689              | 76,587,068            |
| Chromosome 2                 | 155,096,035             | 155,468,627           |
| Chromosome 2                 | 348,208,540             | 348,522,144           |

|                |             |             |
|----------------|-------------|-------------|
| Chromosome 2   | 407,305,863 | 407,476,405 |
| Chromosome 2   | 474,891,789 | 475,146,554 |
| Chromosome 2   | 540,052,390 | 540,055,842 |
| Chromosome 2   | 624,503,504 | 624,522,918 |
| Chromosome 3_X | 133,000,163 | 133,001,250 |
| Chromosome 3_X | 184,069,851 | 184,122,591 |
| Chromosome 3_X | 295,103,485 | 295,251,858 |
| Chromosome 3_X | 370,301,578 | 370,307,164 |
| Chromosome 3_X | 454,989,747 | 454,992,643 |
| Chromosome 3_X | 516,012,504 | 516,138,154 |
| Chromosome 3_X | 562,995,659 | 563,046,092 |

1

2 **Table S7.** Locations of six unique fusion events in the *M. reevesi* genome assembly derived from  
3 one-to-one orthologs between *M. muntjak* and *M. reevesi* and then refined using runs of  
4 collinearity from *B. taurus* and *M. muntjak* against *M. reevesi*.

| <i>M. reevesi</i> chromosome | <i>M. reevesi</i> start | <i>M. reevesi</i> end |
|------------------------------|-------------------------|-----------------------|
| Chromosome 1                 | 216,558,007             | 216,594,231           |
| Chromosome 2                 | 78,441,940              | 78,562,328            |
| Chromosome 3                 | 154,290,838             | 154,298,872           |
| Chromosome 3                 | 191,988,183             | 192,099,419           |
| Chromosome 4                 | 111,704,918             | 111,709,617           |
| Chromosome 5                 | 47,104,391              | 47,224,935            |

5

6

## 7 **References**

8

9 1. Marks J. Rates of karyotype evolution. *Syst Zool.* 1983;32:207–9.

10 2. Gladkikh OL, Romanenko SA, Lemskaya NA, Serdyukova NA, O’Brien PCM, Kovalskaya  
11 JM, et al. Rapid karyotype evolution in *Lasiopodomys* involved at least two autosome - sex  
12 chromosome translocations. *PLoS One.* 2016;11:e0167653.

13 3. Nash WG, Wienberg J, Ferguson-Smith MA, Menninger JC, O’Brien SJ. Comparative  
14 genomics: tracking chromosome evolution in the family Ursidae using reciprocal chromosome

- 1 painting. *Cytogenet Genome Res.* 1998;83:182–92.
- 2 4. Carbone L, Harris RA, Gnerre S, Veeramah KR, Lorente-Galdos B, Huddleston J, et al.
- 3 Gibbon genome and the fast karyotype evolution of small apes. *Nature.* 2014;513:195–201.
- 4 5. Gordon DJ, Resio B, Pellman D. Causes and consequences of aneuploidy in cancer. *Nat Rev*
- 5 *Genet.* 2012;13:189–203.
- 6 6. Lin CC, Sasi R, Fan Y-S, Chen Z-Q. New evidence for tandem chromosome fusions in the
- 7 karyotypic evolution of Asian muntjacs. *Chromosoma.* 1991;101:19–24.
- 8 7. Robertson WRB. Chromosome studies. I. Taxonomic relationships shown in the chromosomes
- 9 of Tettigidae and Acrididae: V-shaped chromosomes and their significance in Acrididae,
- 10 Locustidae, and Gryllidae: chromosomes and variation. *J Morphol.* 1916;27:179–331.
- 11 8. Hartmann N, Scherthan H. Characterization of ancestral chromosome fusion points in the
- 12 Indian muntjac deer. *Chromosoma.* 2004;112:213–20.
- 13 9. Chi JX, Huang L, Nie W, Wang J, Su B, Yang F. Defining the orientation of the tandem
- 14 fusions that occurred during the evolution of Indian muntjac chromosomes by BAC mapping.
- 15 *Chromosoma.* 2005;114:167–72.
- 16 10. Yang F, O'Brien PCM, Wienberg J, Ferguson-Smith MA. A reappraisal of the tandem fusion
- 17 theory of karyotype evolution in the Indian muntjac using chromosome painting. *Chromosom*
- 18 *Res.* 1997;5:109–17.
- 19 11. Wang W, Lan H. Rapid and parallel chromosomal number reductions in muntjac deer
- 20 inferred from mitochondrial DNA phylogeny. *Mol Biol Evol.* 2000;17:1326–33.
- 21 12. Nakatani Y, Takeda H, Kohara Y, Morishita S. Reconstruction of the vertebrate ancestral
- 22 genome reveals dynamic genome reorganization in early vertebrates. *Genome Res.*
- 23 2007;17:1254–65.

- 1 13. Farré M, Kim J, Proskuryakova AA, Zhang Y, Kulemzina AI, Li Q, et al. Evolution of gene  
2 regulation in ruminants differs between evolutionary breakpoint regions and homologous  
3 synteny blocks. *Genome Res.* 2019;29:576–89.
- 4 14. Chen L, Qiu Q, Jiang Y, Wang K, Lin Z, Li Z, et al. Large-scale ruminant genome  
5 sequencing provides insights into their evolution and distinct traits. *Science.* 2019;364:eaav6202.
- 6 15. Zimin A V., Delcher AL, Florea L, Kelley DR, Schatz MC, Puiu D, et al. A whole-genome  
7 assembly of the domestic cow, *Bos taurus*. *Genome Biol.* 2009;10:R42.
- 8 16. Bana NÁ, Nyiri A, Nagy J, Frank K, Nagy T, Stéger V, et al. The red deer *Cervus elaphus*  
9 genome CerEla1.0: sequencing, annotating, genes, and chromosomes. *Mol Genet Genomics.*  
10 2018;293:665–84.
- 11 17. Li Z, Lin Z, Ba H, Chen L, Yang Y, Wang K, et al. Draft genome of the reindeer (*Rangifer*  
12 *tarandus*). *Gigascience.* 2017;6:1–5.
- 13 18. Wurster DH, Benirschke K. Indian muntjac, *Muntiacus muntjak*: a deer with a low diploid  
14 chromosome number. *Science.* 1970;168:1364–6.
- 15 19. Wurster DH, Benirschke K. Chromosome studies in some deer, the springbok, and the  
16 pronghorn, with notes on placentation in deer. *Cytologia (Tokyo).* 1967;32:273–85.
- 17 20. Frohlich J, Kubickova S, Musilova P, Cernohorska H, Muskova H, Vodicka R, et al.  
18 Karyotype relationships among selected deer species and cattle revealed by bovine FISH probes.  
19 *PLoS One.* 2017;12:e0187559.
- 20 21. Zhou Q, Huang L, Zhang J, Zhao X, Zhang Q, Song F, et al. Comparative genomic analysis  
21 links karyotypic evolution with genomic evolution in the Indian muntjac (*Muntiacus muntjak*  
22 *vaginalis*). *Chromosoma.* 2006;115:427–36.
- 23 22. Lin C-C, Hsu P-C, Li T-S, Liao S-J, Cheng Y-M, Hsieh L-J, et al. Construction of an Indian

- 1 muntjac BAC library and production of the most highly dense FISH map of the species. *Zool*
- 2 *Stud.* 2008;47:282–92.
- 3 23. Tsipouri V, Schueler MG, Hu S, NISC Comparative Sequencing Program, Dutra A, Pak E, et
- 4 al. Comparative sequence analyses reveal sites of ancestral chromosomal fusions in the Indian
- 5 muntjac genome. *Genome Biol.* 2008;9:R155.
- 6 24. Jiang Y, Xie M, Chen W, Talbot R, Maddox JF, Faraut T, et al. The sheep genome
- 7 illuminates biology of the rumen and lipid metabolism. *Science.* 2014;344:1168–73.
- 8 25. Schneider VA, Graves-Lindsay T, Howe K, Bouk N, Chen H-C, Kitts PA, et al. Evaluation
- 9 of GRCh38 and de novo haploid genome assemblies demonstrates the enduring quality of the
- 10 reference assembly. *Genome Res.* 2017;27:849–64.
- 11 26. Jones P, Binns D, Chang H-Y, Fraser M, Li W, McAnulla C, et al. InterProScan 5: genome-
- 12 scale protein function classification. *Bioinformatics.* 2014;30:1236–40.
- 13 27. Huang L, Chi J, Wang J, Nie W, Su W, Yang F. High-density comparative BAC mapping in
- 14 the black muntjac (*Muntiacus crinifrons*): molecular cytogenetic dissection of the origin of MCR
- 15 1p+4 in the X1X2Y1Y2Y3 sex chromosome system. *Genomics.* 2006;87:608–15.
- 16 28. Huang L, Wang J, Nie W, Su W, Yang F. Tandem chromosome fusions in karyotypic
- 17 evolution of *Muntiacus*: evidence from *M. feae* and *M. gongshanensis*. *Chromosom Res.*
- 18 2006;14:637–47.
- 19 29. Murmann AE, Mincheva A, Scheuermann MO, Gautier M, Yang F, Buitkamp J, et al.
- 20 Comparative gene mapping in cattle, Indian muntjac, and Chinese muntjac by fluorescence in
- 21 situ hybridization. *Genetica.* 2008;134:345–51.
- 22 30. Maruyama T, Imai HT. Evolutionary rate of the mammalian karyotype. *J Theor Biol.*
- 23 1981;90:111–21.

- 1 31. The Chimpanzee Sequencing and Analysis Consortium. Initial sequence of the chimpanzee  
2 genome and comparison with the human genome. *Nature*. 2005;437:69–87.
- 3 32. Locke DP, Hillier LW, Warren WC, Worley KC, Nazareth L V., Muzny DM, et al.  
4 Comparative and demographic analysis of orang-utan genomes. *Nature*. 2011;469:529–33.
- 5 33. Ijdo JW, Baldini A, Ward DC, Reeders ST, Wells RA. Origin of human chromosome 2: an  
6 ancestral telomere-telomere fusion. *Proc Natl Acad Sci USA*. 1991;88:9051–5.
- 7 34. Zou Y, Yi X, Wright WE, Shay JW. Human telomerase can immortalize Indian muntjac  
8 cells. *Exp Cell Res*. 2002;281:63–76.
- 9 35. Lieberman-Aiden E, van Berkum NL, Williams L, Imakaev M, Ragoczy T, Telling A, et al.  
10 Comprehensive mapping of long-range interactions reveals folding principles of the human  
11 genome. *Science*. 2009;326:289–93.
- 12 36. Liming S, Pathak S. Gametogenesis in a male Indian muntjac x Chinese muntjac hybrid.  
13 *Cytogenet Genome Res*. 1981;30:152–6.
- 14 37. Ghavi-Helm Y, Jankowski A, Meiers S, Viales RR, Korbel JO, Furlong EEM. Highly  
15 rearranged chromosomes reveal uncoupling between genome topology and gene expression. *Nat*  
16 *Genet*. 2019;51:1272–82.
- 17 38. Hockemeyer D, Sfeir AJ, Shay JW, Wright WE, de Lange T. POT1 protects telomeres from a  
18 transient DNA damage response and determines how human chromosomes end. *EMBO J*.  
19 2005;24:2667–78.
- 20 39. Weisenfeld NI, Kumar V, Shah P, Church DM, Jaffe DB. Direct determination of diploid  
21 genome sequences. *Genome Res*. 2017;27:757–67.
- 22 40. Camacho C, Coulouris G, Avagyan V, Ma N, Papadopoulos J, Bealer K, et al. BLAST+:  
23 architecture and applications. *BMC Bioinformatics*. 2009;10:421.



- 1 41. Yanfeng S, Xiangnian S, Jian L, Xiaomei Z, Haijun Z. Sequence and organization of the  
2 complete mitochondrial genome of the Indian muntjac (*Muntiacus muntjak*). *Acta Zool Sin.*  
3 2003;49:629–36.
- 4 42. Zhang XM, Zhang HJ, Mou Y, Li J, Yi GC, Shan XN. *Muntiacus reevesi* mitochondrion,  
5 complete genome. NCBI Reference Sequence NC\_004069.1; 2002.
- 6 43. Durand NC, Shamim MS, Machol I, Rao SSP, Huntley MH, Lander ES, et al. Juicer provides  
7 a one-click system for analyzing loop-resolution Hi-C experiments. *Cell Syst.* 2016;3:95–8.
- 8 44. Dudchenko O, Batra SS, Omer AD, Nyquist SK, Hoeger M, Durand NC, et al. De novo  
9 assembly of the *Aedes aegypti* genome using Hi-C yields chromosome-length scaffolds. *Science.*  
10 2017;356:92–5.
- 11 45. Durand NC, Robinson JT, Shamim MS, Machol I, Mesirov JP, Lander ES, et al. Juicebox  
12 provides a visualization system for Hi-C contact maps with unlimited zoom. *Cell Syst.*  
13 2016;3:99–101.
- 14 46. Kajitani R, Toshimoto K, Noguchi H, Toyoda A, Ogura Y, Okuno M, et al. Efficient de novo  
15 assembly of highly heterozygous genomes from whole-genome shotgun short reads. *Genome*  
16 *Res.* 2014;24:1384–95.
- 17 47. Shen W, Le S, Li Y, Hu F. SeqKit: a cross-platform and ultrafast toolkit for FASTA/Q file  
18 manipulation. *PLoS One.* 2016;11:e0163962.
- 19 48. Li H, Durbin R. Fast and accurate short read alignment with Burrows-Wheeler transform.  
20 *Bioinformatics.* 2009;25:1754–60.
- 21 49. Smit AFA, Hubley R. RepeatModeler Open-1.0 [Internet]. 2015. Available from:  
22 <http://www.repeatmasker.org>
- 23 50. Bao W, Kojima KK, Kohany O. Repbase Update, a database of repetitive elements in

- 1 eukaryotic genomes. *Mob DNA*. 2015;6:11.
- 2 51. Smit AFA, Hubley R, Green P. RepeatMasker Open-4.0 [Internet]. 2015. Available from:  
3 <http://www.repeatmasker.org>
- 4 52. Keilwagen J, Wenk M, Erickson JL, Schattat MH, Grau J, Hartung F. Using intron position  
5 conservation for homology-based gene prediction. *Nucleic Acids Res*. 2016;44:e89.
- 6 53. Cunningham F, Achuthan P, Akanni W, Allen J, Amode MR, Armean IM, et al. Ensembl  
7 2019. *Nucleic Acids Res*. 2019;47:D745–51.
- 8 54. Kent WJ, Baertsch R, Hinrichs A, Miller W, Haussler D. Evolution’s cauldron: duplication,  
9 deletion, and rearrangement in the mouse and human genomes. *Proc Natl Acad Sci USA*.  
10 2003;100:11484–9.
- 11 55. Wang Y, Coleman-Derr D, Chen G, Gu YQ. OrthoVenn: a web server for genome wide  
12 comparison and annotation of orthologous clusters across multiple species. *Nucleic Acids Res*.  
13 2015;43:W78–84.
- 14 56. Larkin MA, Blackshields G, Brown NP, Chenna R, Mcgettigan PA, McWilliam H, et al.  
15 Clustal W and Clustal X version 2.0. *Bioinformatics*. 2007;23:2947–8.
- 16 57. Yang Z. PAML 4: phylogenetic analysis by maximum likelihood. *Mol Biol Evol*.  
17 2007;24:1586–91.
- 18 58. The UniProt Consortium. UniProt: the universal protein knowledgebase. *Nucleic Acids Res*.  
19 2017;45:D158–69.
- 20 59. Paten B, Earl D, Nguyen N, Diekhans M, Zerbino D, Haussler D. Cactus: algorithms for  
21 genome multiple sequence alignment. *Genome Res*. 2011;21:1512–28.
- 22 60. Hickey G, Paten B, Earl D, Zerbino D, Haussler D. HAL: a hierarchical format for storing  
23 and analyzing multiple genome alignments. *Bioinformatics*. 2013;29:1341–2.

- 1 61. Suarez HG, Langer BE, Ladde P, Hiller M. chainCleaner improves genome alignment  
2 specificity and sensitivity. *Bioinformatics*. 2017;33:1596–603.
- 3 62. Blanchette M, Kent WJ, Riemer C, Elnitski L, Smit AFA, Roskin KM, et al. Aligning  
4 multiple genomic sequences with the threaded blockset aligner. *Genome Res* [Internet].  
5 2004;14:708–15. Available from: <http://www.genome.org/cgi/doi/10.1101/gr.1933104>
- 6 63. Junier T, Zdobnov EM. The Newick utilities: high-throughput phylogenetic tree processing  
7 in the UNIX shell. *Bioinformatics*. 2010;26:1669–70.
- 8 64. Arnold C, Matthews LJ, Nunn CL. The 10kTrees website: a new online resource for primate  
9 phylogeny. *Evol Anthropol*. 2010;19:114–8.
- 10 65. Kielbasa SM, Wan R, Sato K, Horton P, Frith MC. Adaptive seeds tame genomic sequence  
11 comparison. *Genome Res*. 2011;21:487–93.
- 12 66. Stamatakis A. RAxML version 8: a tool for phylogenetic analysis and post-analysis of large  
13 phylogenies. *Bioinformatics*. 2014;30:1312–3.
- 14 67. Mello B. Estimating timetrees with MEGA and the TimeTree resource. *Mol Biol Evol*.  
15 2018;35:2334–42.
- 16 68. Kumar S, Stecher G, Suleski M, Hedges SB. TimeTree: a resource for timelines, timetrees,  
17 and divergence times. *Mol Biol Evol*. 2017;34:1812–9.
- 18 69. Kumar S, Stecher G, Tamura K. MEGA7: Molecular Evolutionary Genetics Analysis version  
19 7.0 for bigger datasets. *Mol Biol Evol*. 2016;33:1870–4.
- 20 70. Tamura K, Battistuzzi FU, Billing-Ross P, Murillo O, Filipski A, Kumar S. Estimating  
21 divergence times in large molecular phylogenies. *Proc Natl Acad Sci USA*. 2012;109:19333–8.
- 22 71. Solounias N, Barry JC, Bernor RL, Lindsay EH, Raza SM. The oldest bovid from the  
23 Siwaliks, Pakistan. *J Vertebr Paleontol*. 1995;15:806–14.

- 1 72. Li H, Handsaker B, Wysoker A, Fennell T, Ruan J, Homer N, et al. The Sequence  
2 Alignment/Map format and SAMtools. *Bioinformatics*. 2009;25:2078–9.
- 3 73. Xu L, Dong Z, Fang L, Luo Y, Wei Z, Guo H, et al. OrthoVenn2: a web server for whole-  
4 genome comparison and annotation of orthologous clusters across multiple species. *Nucleic  
5 Acids Res*. 2019;47:W52–W58.
- 6 74. Krzywinski M, Schein J, Birol I, Connors J, Gascoyne R, Horsman D, et al. Circos: an  
7 information aesthetic for comparative genomics. *Genome Res*. 2009;19:1639–45.
- 8 75. Bradnam KR, Fass JN, Alexandrov A, Baranay P, Bechner M, Birol I, et al. Assemblathon 2:  
9 evaluating de novo methods of genome assembly in three vertebrate species. *Gigascience*.  
10 2013;2:10.
- 11 76. Gremme G, Steinbiss S, Kurtz S. GenomeTools: a comprehensive software library for  
12 efficient processing of structured genome annotations. *IEEE/ACM Trans Comput Biol  
13 Bioinforma*. 2013;10:645–56.
- 14

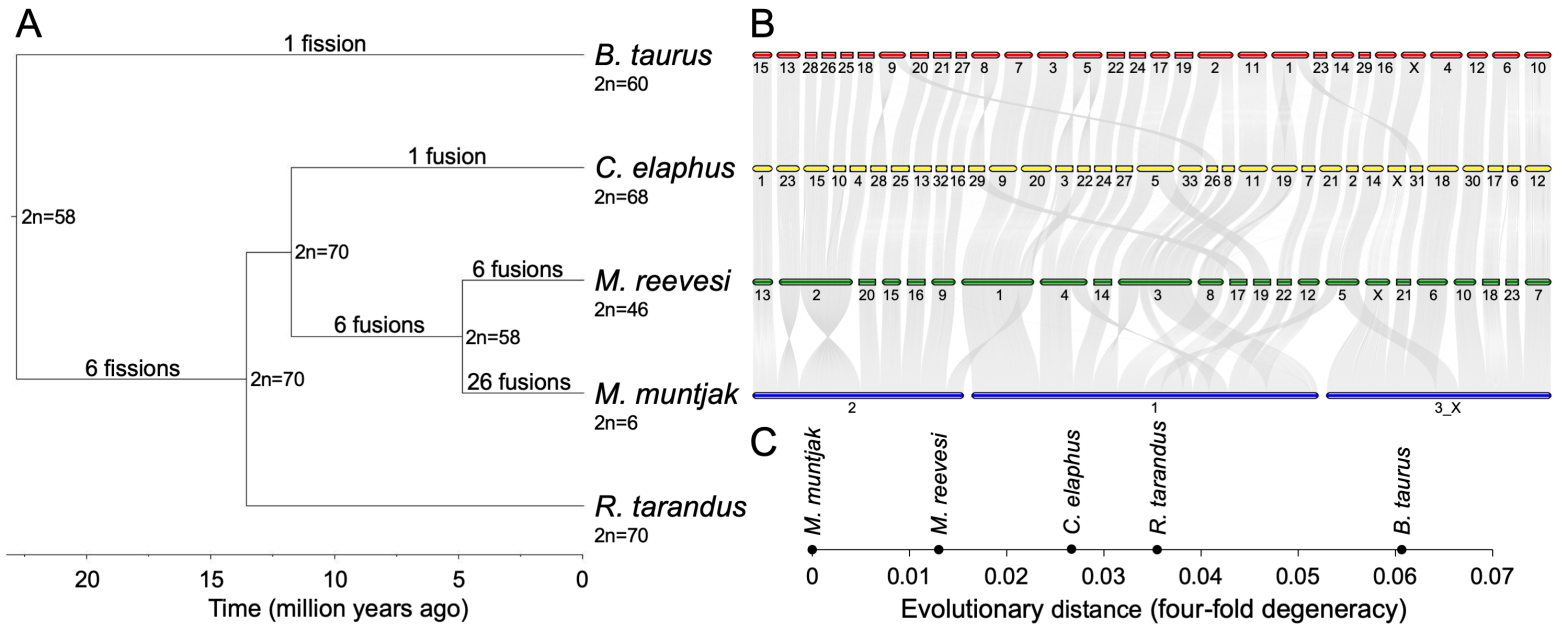

Figure 1

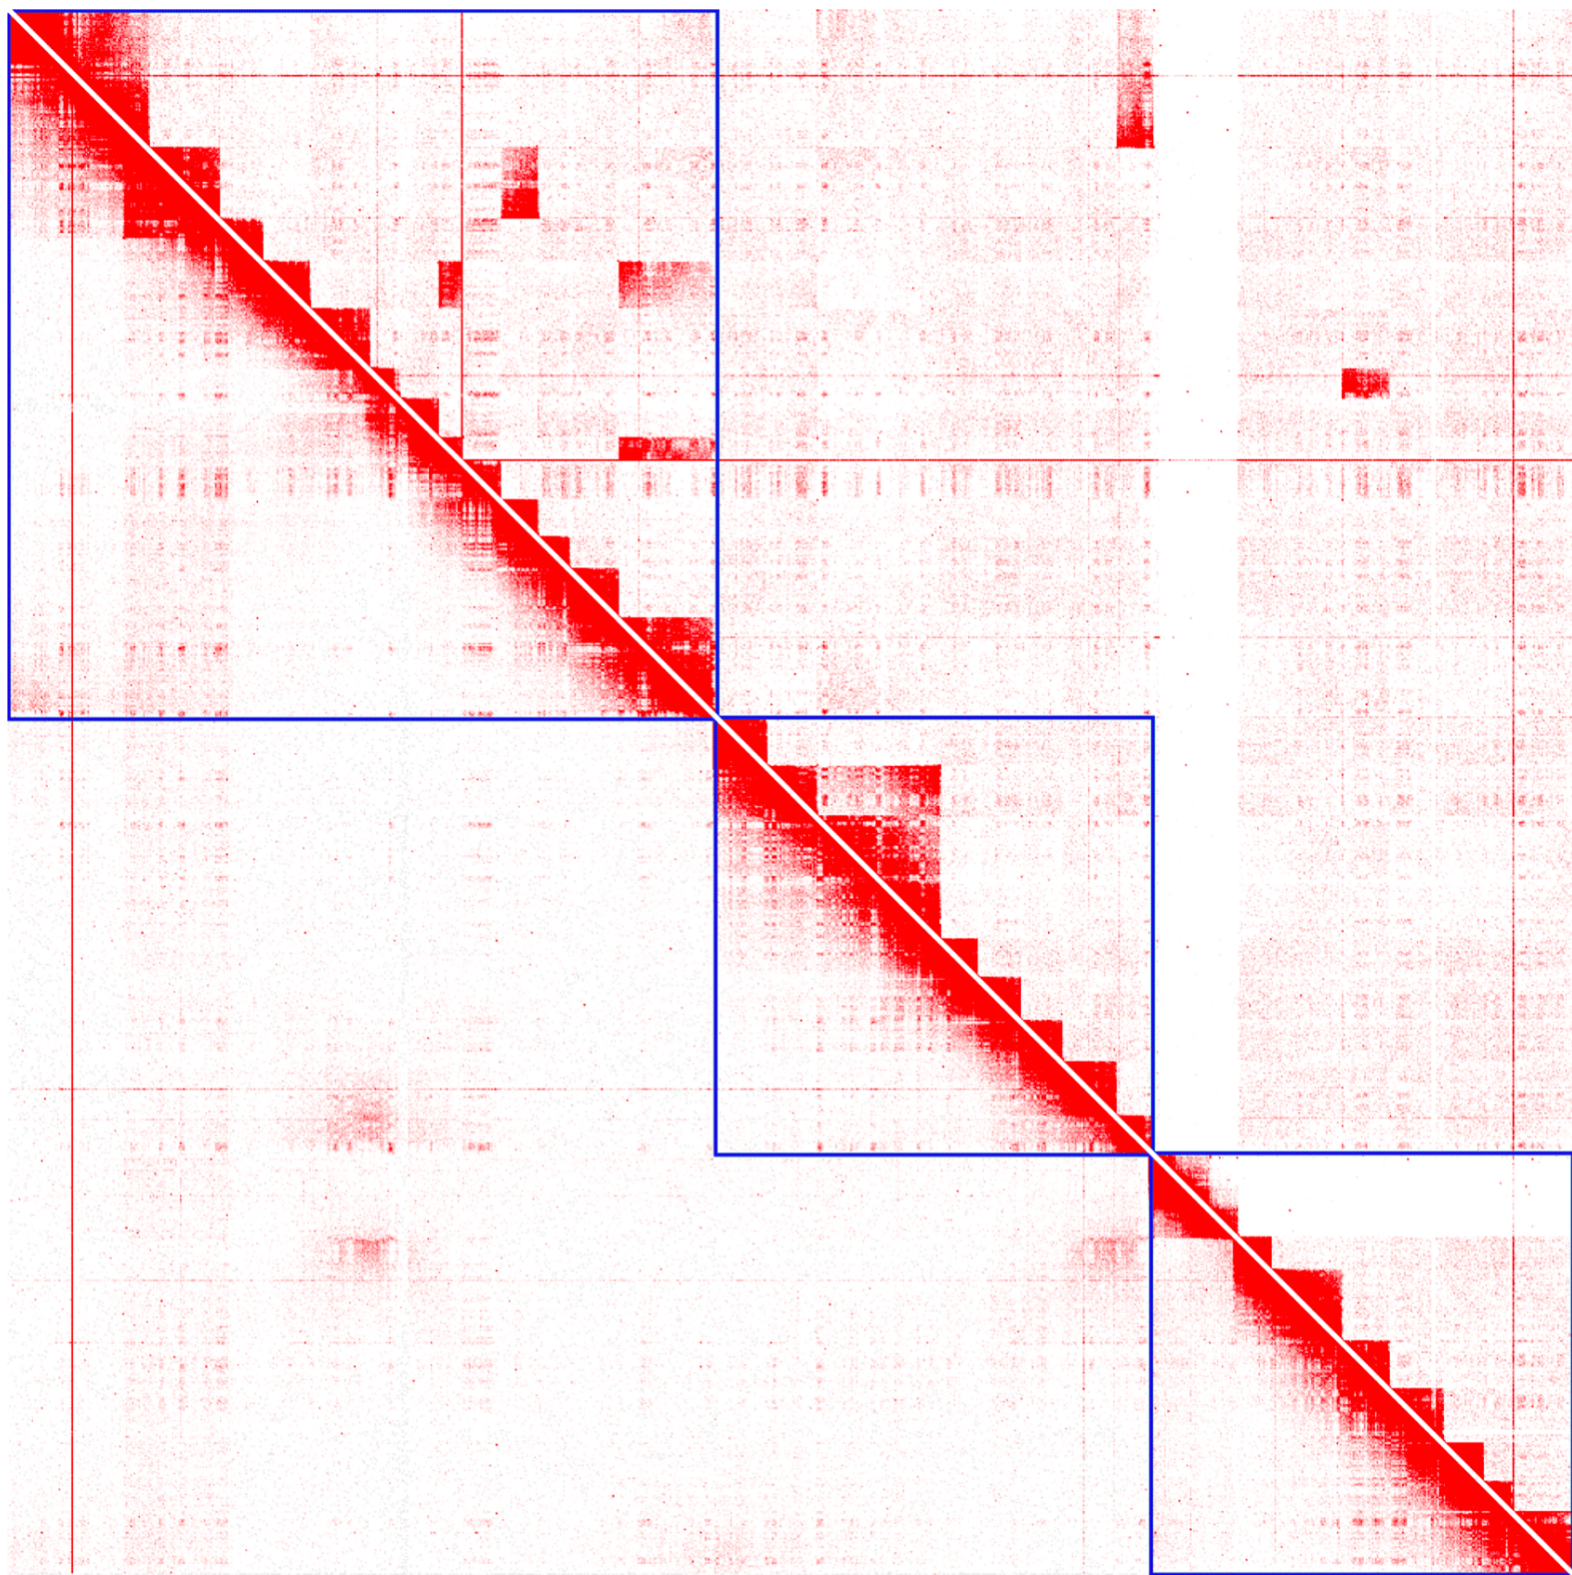

Figure 2

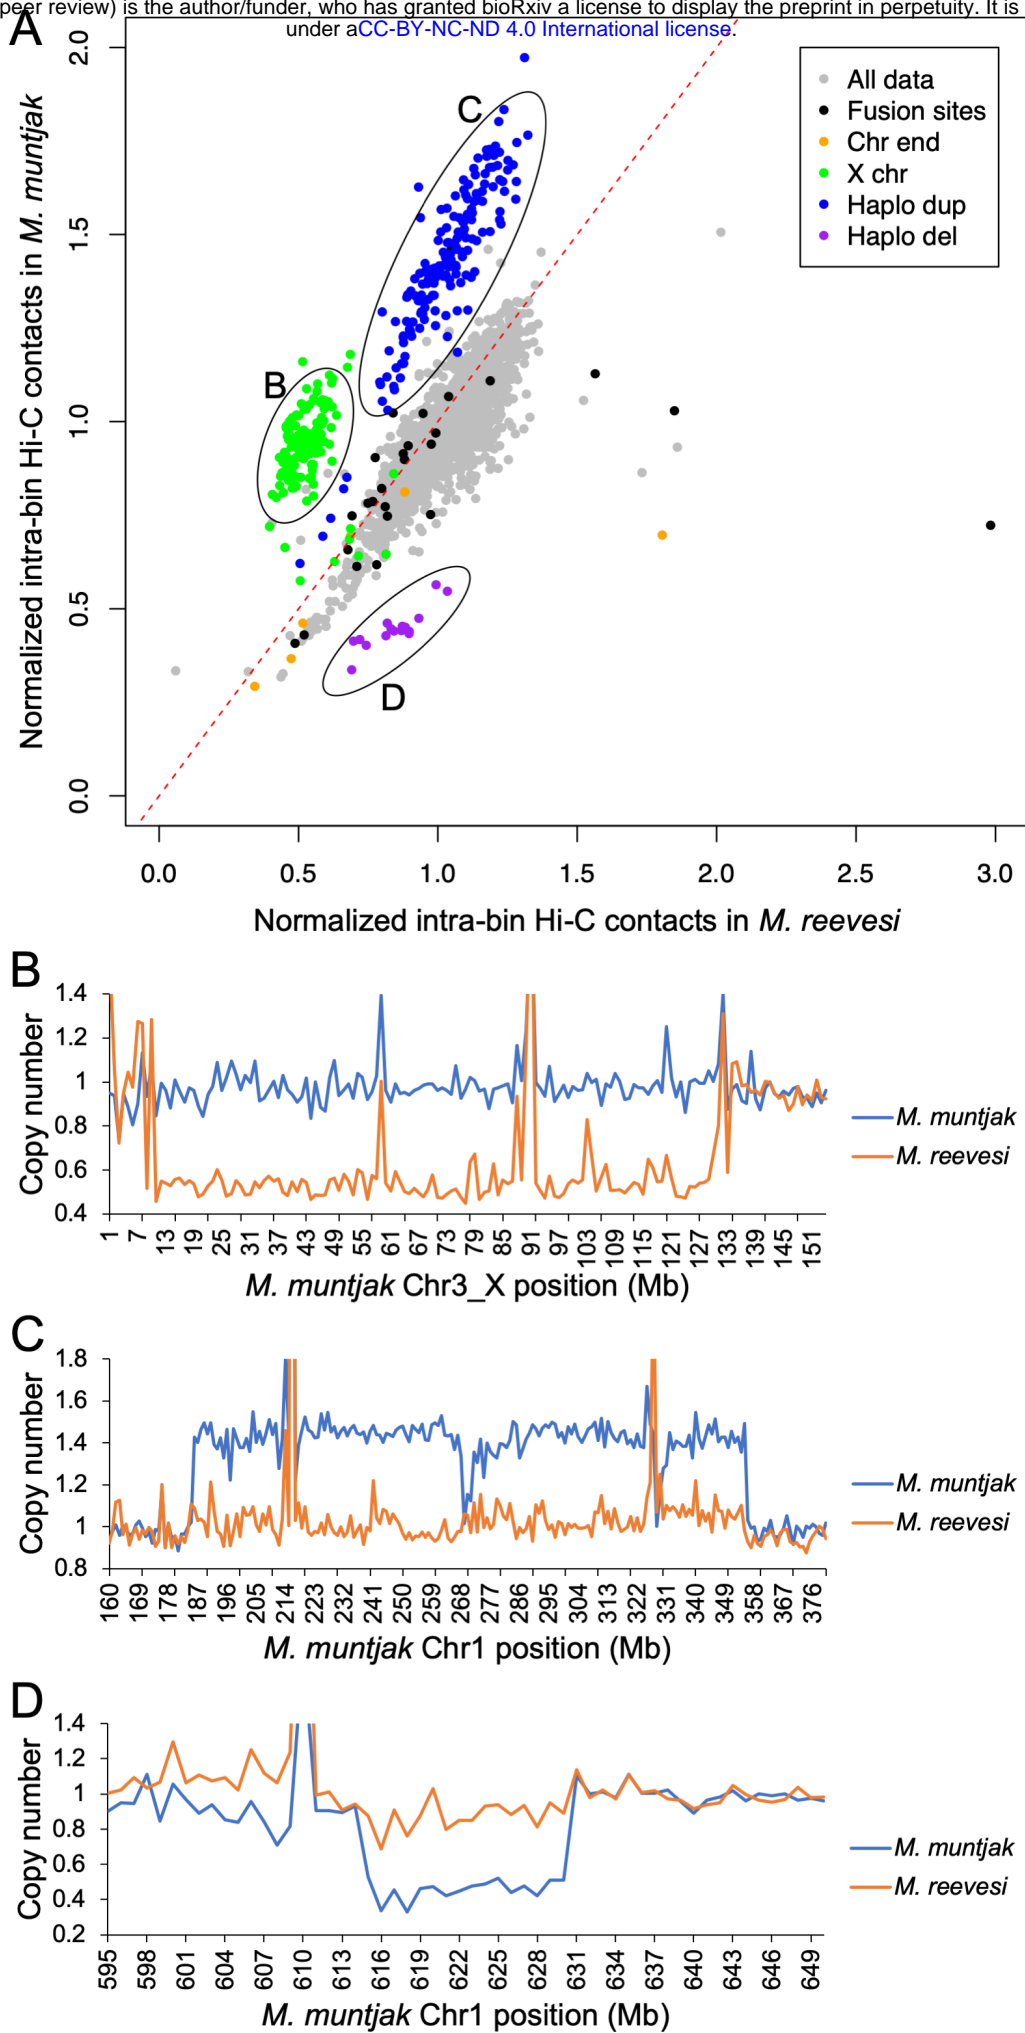

Figure 3

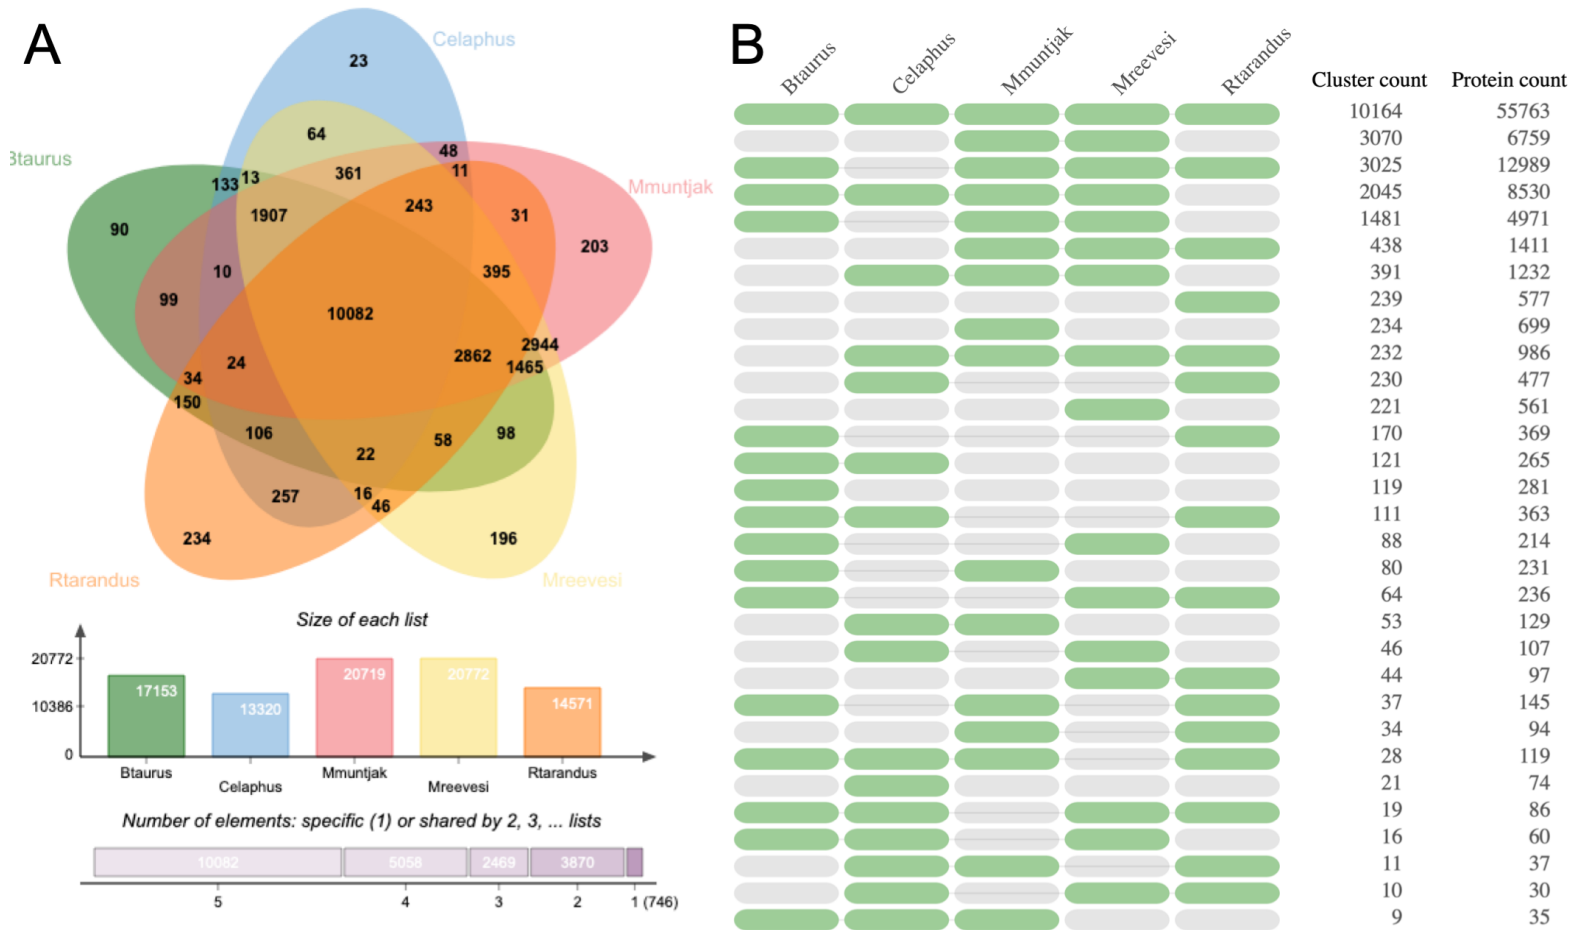

Figure S1



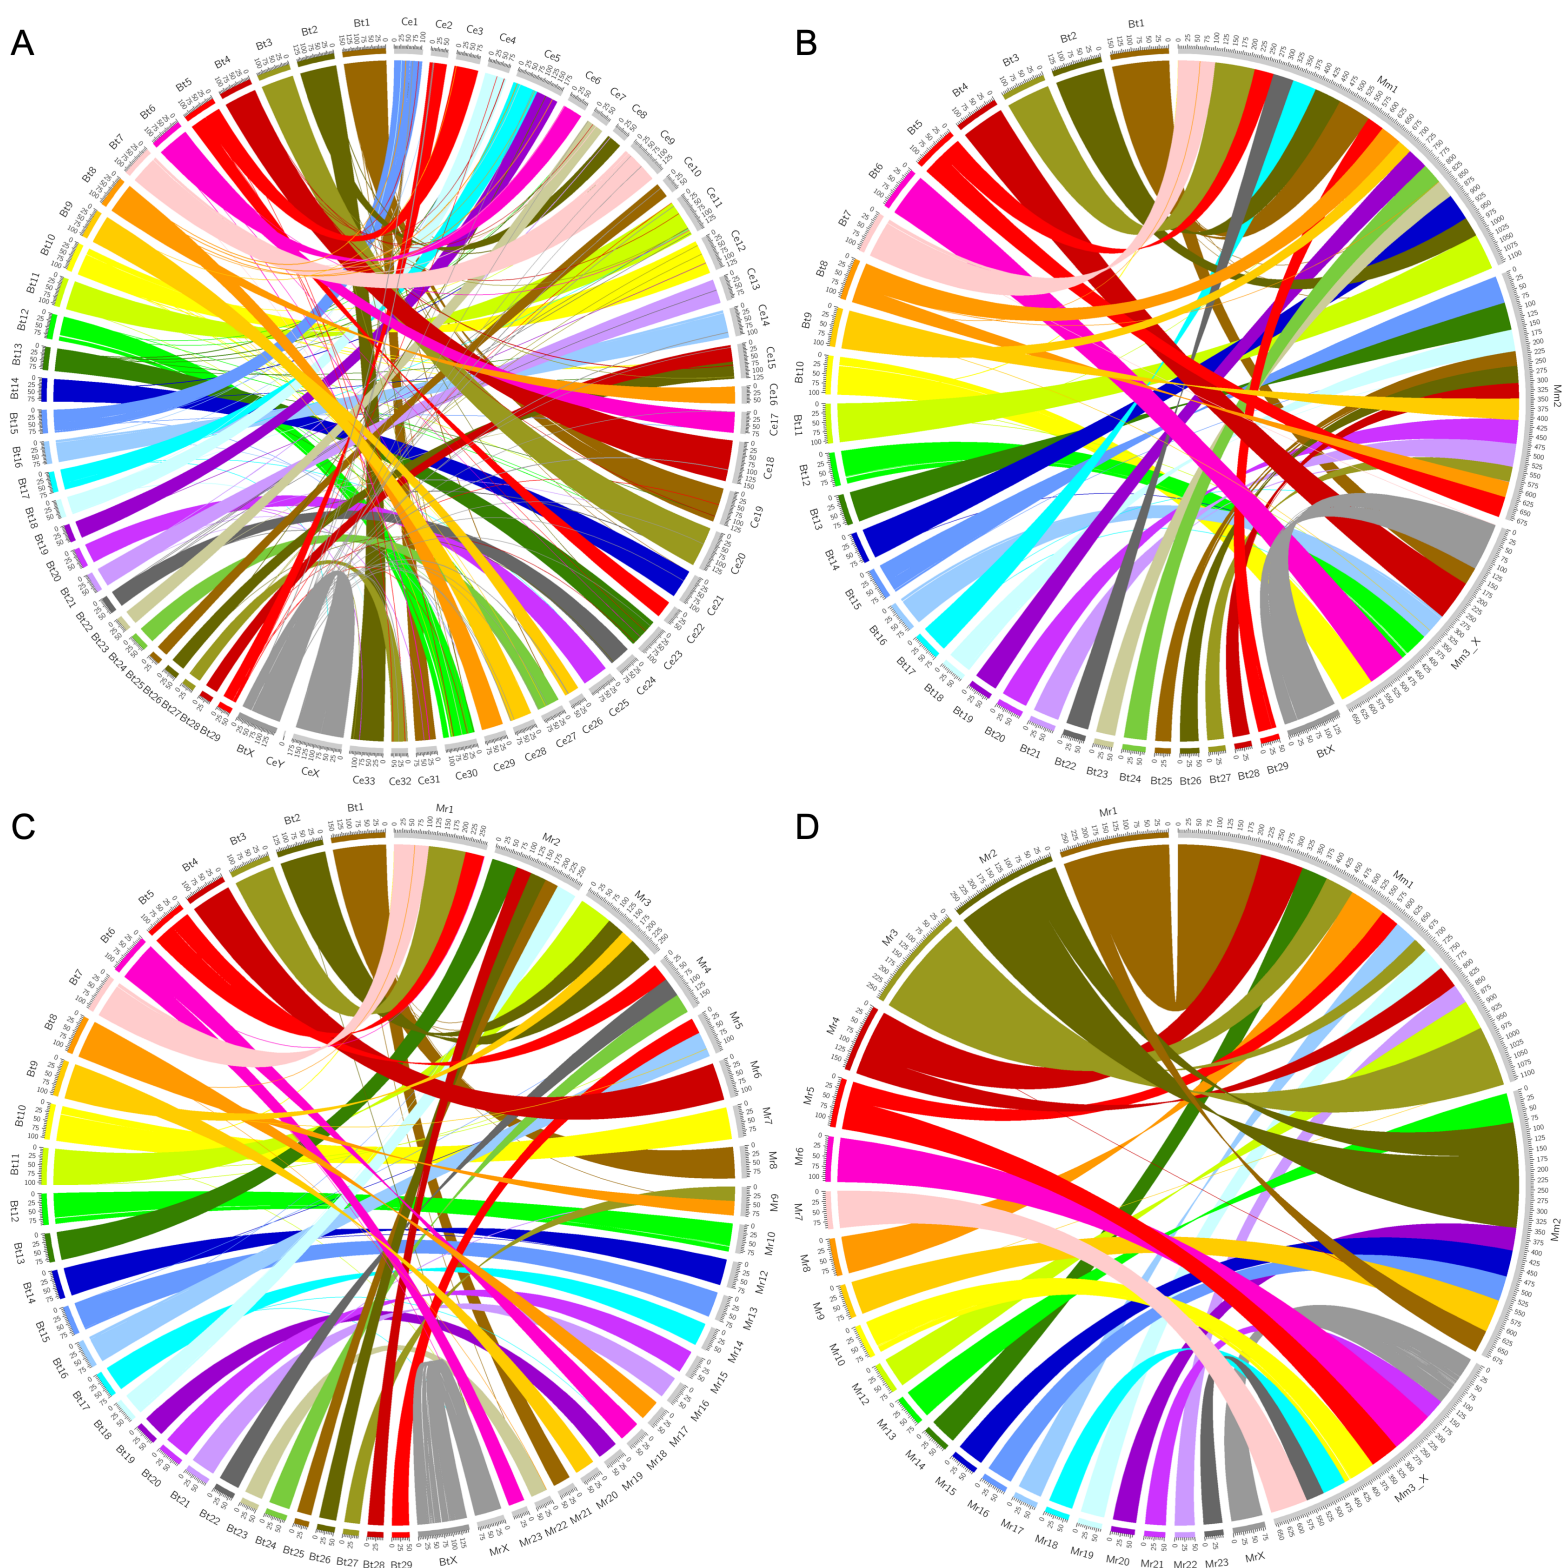

Figure S2

**A**

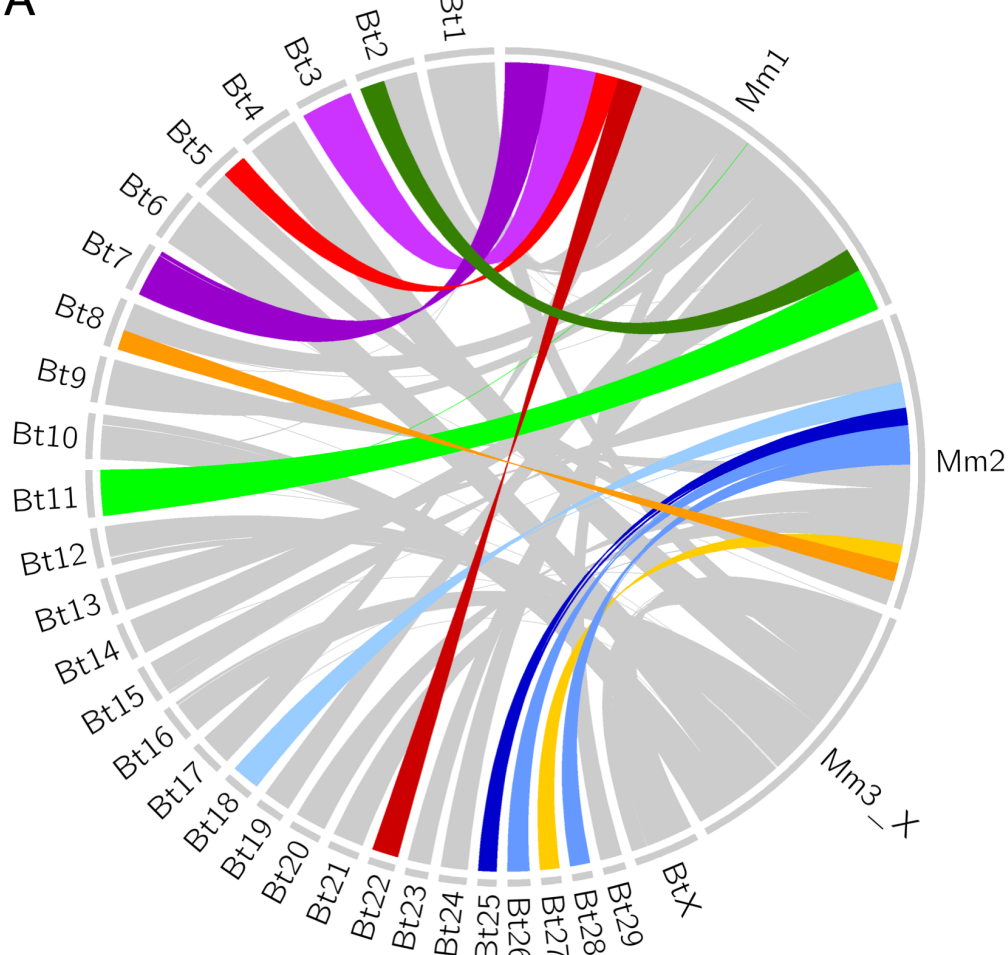

**B**

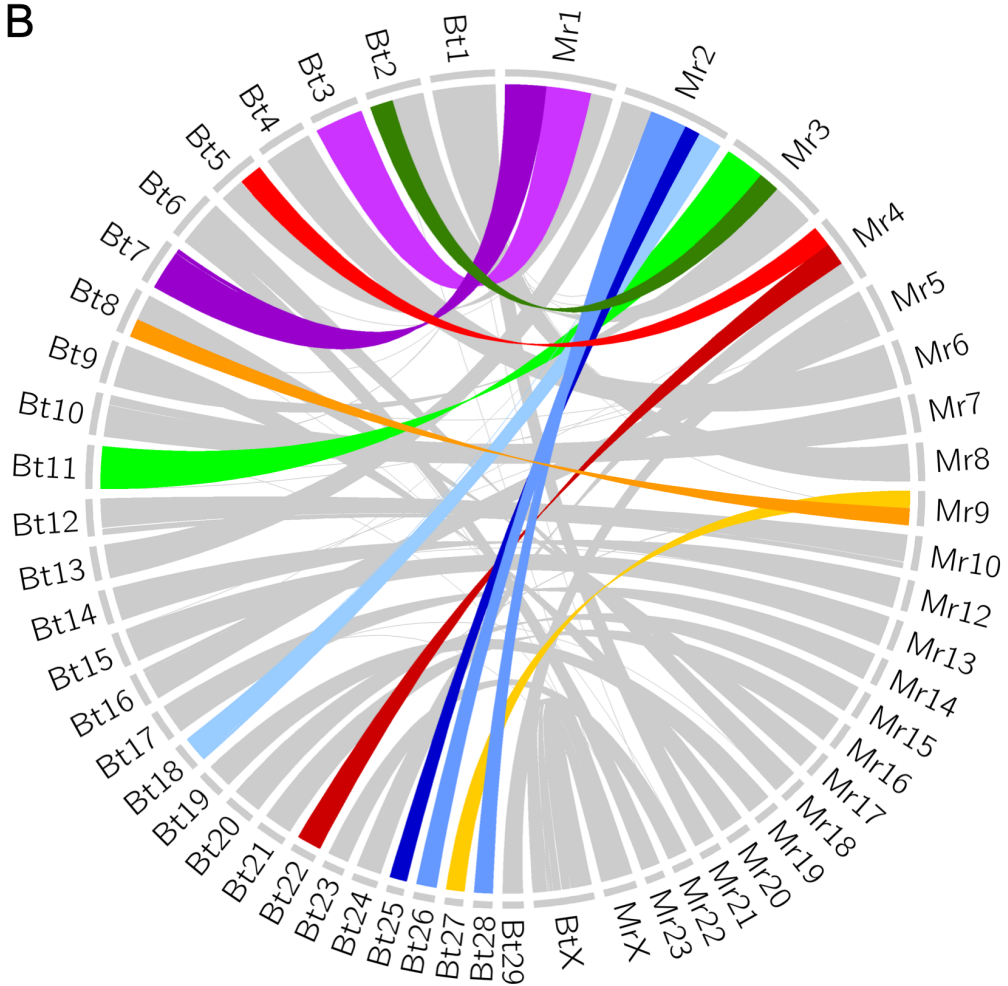

A

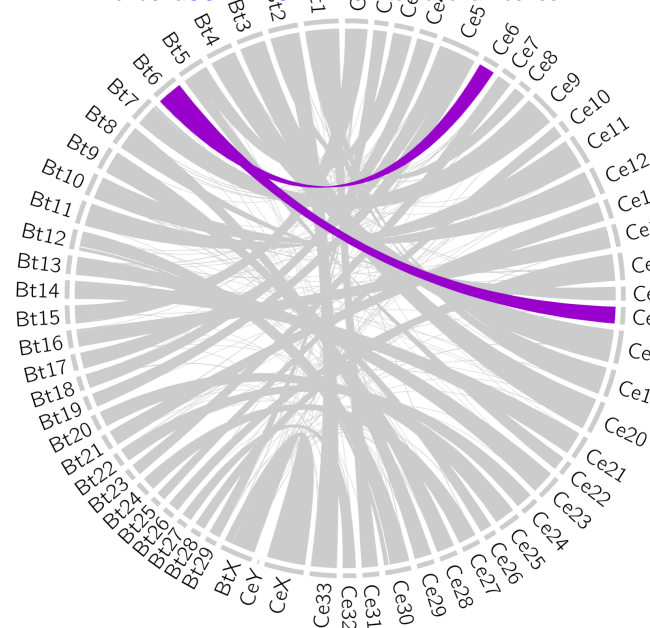

B

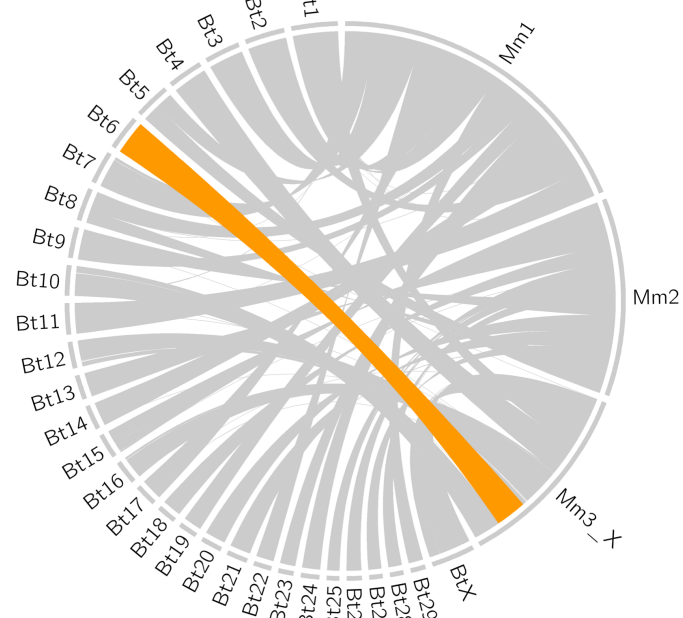

C

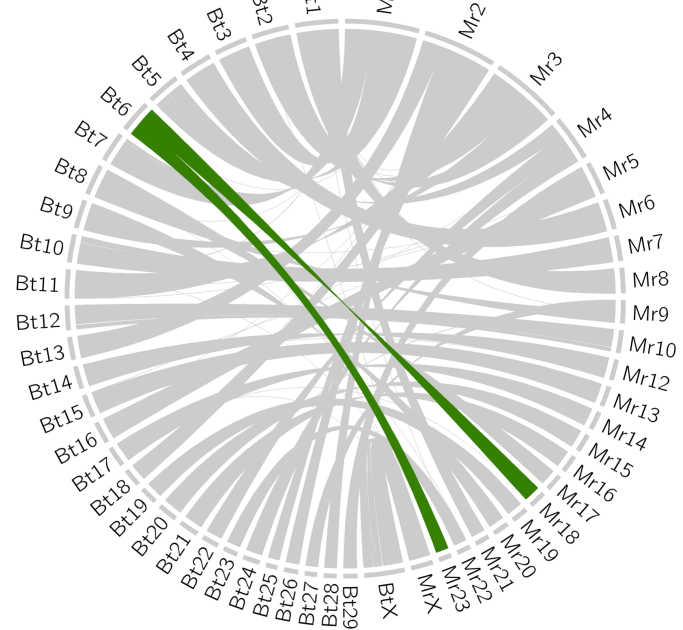

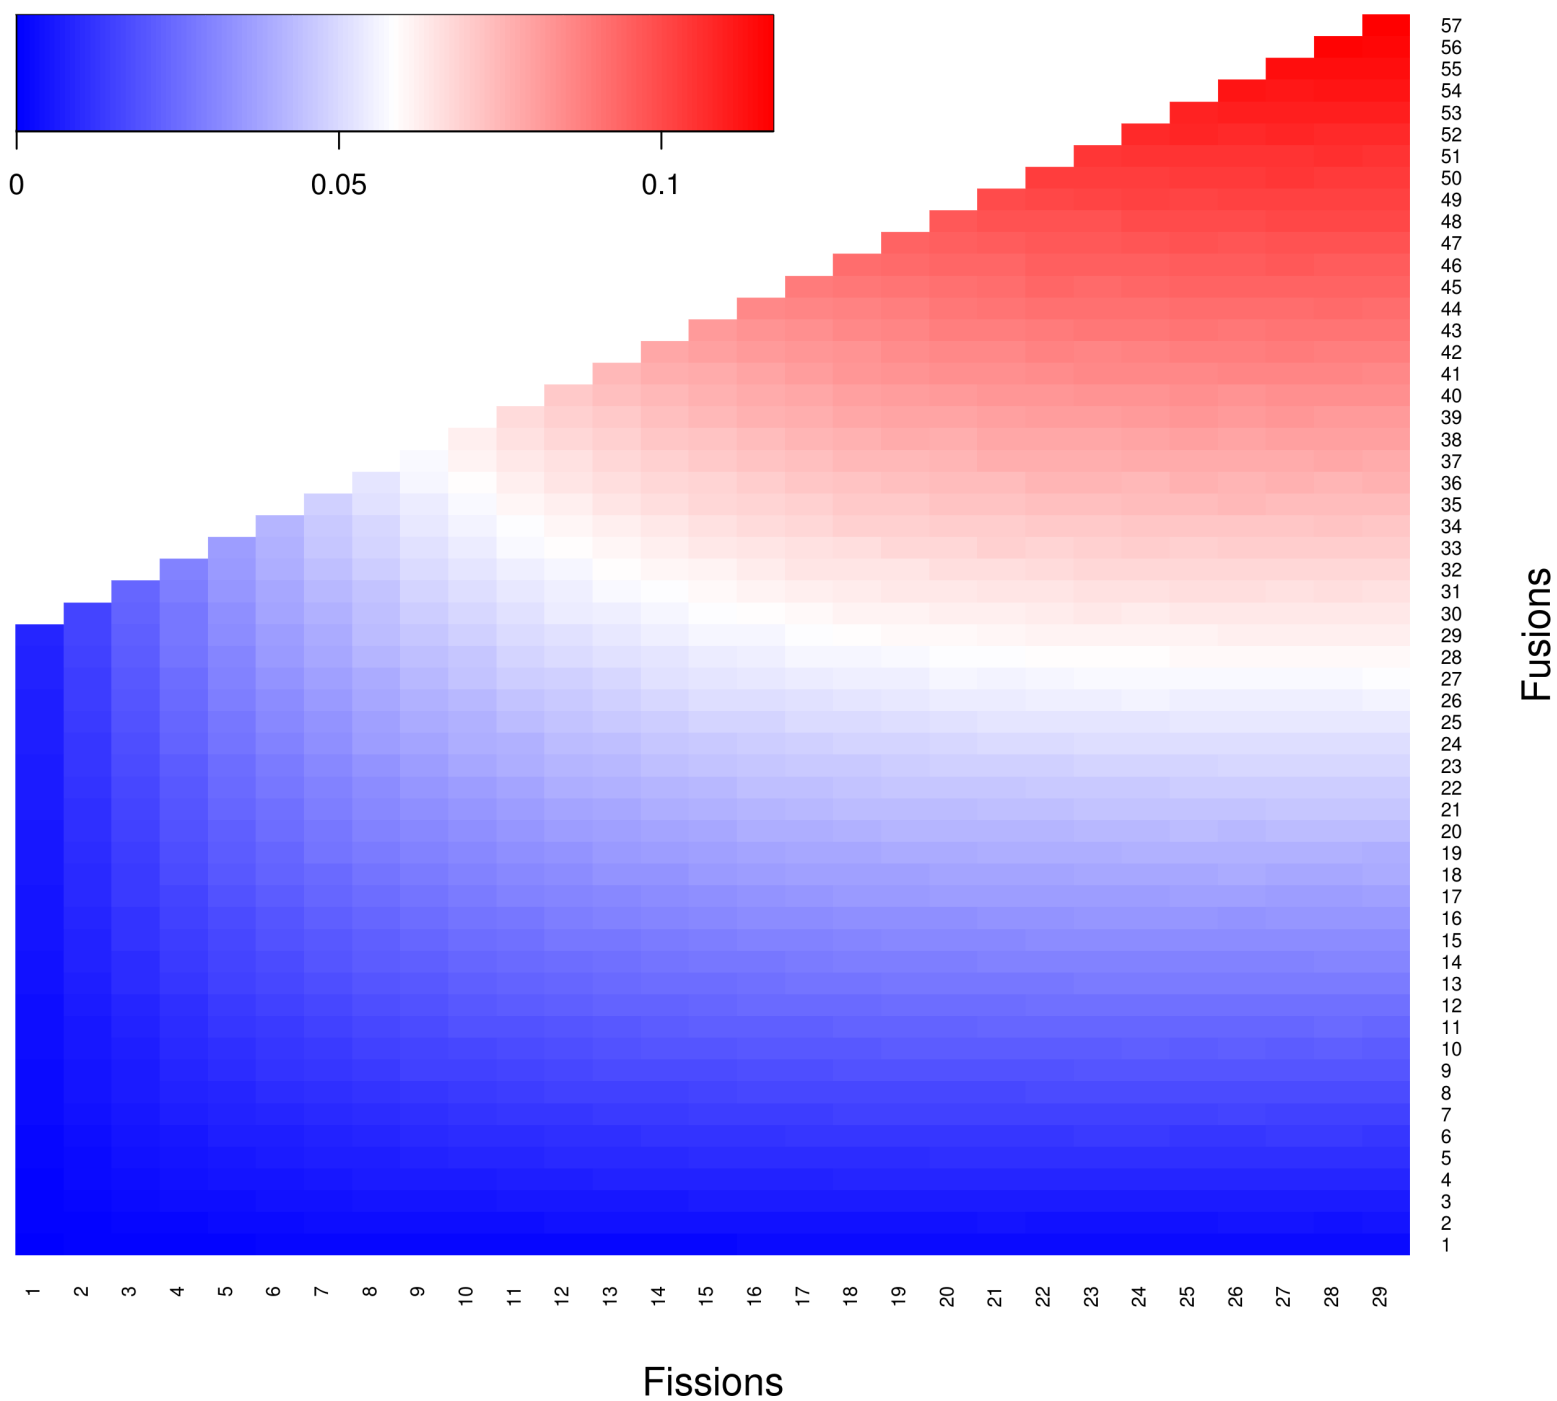

Figure S5

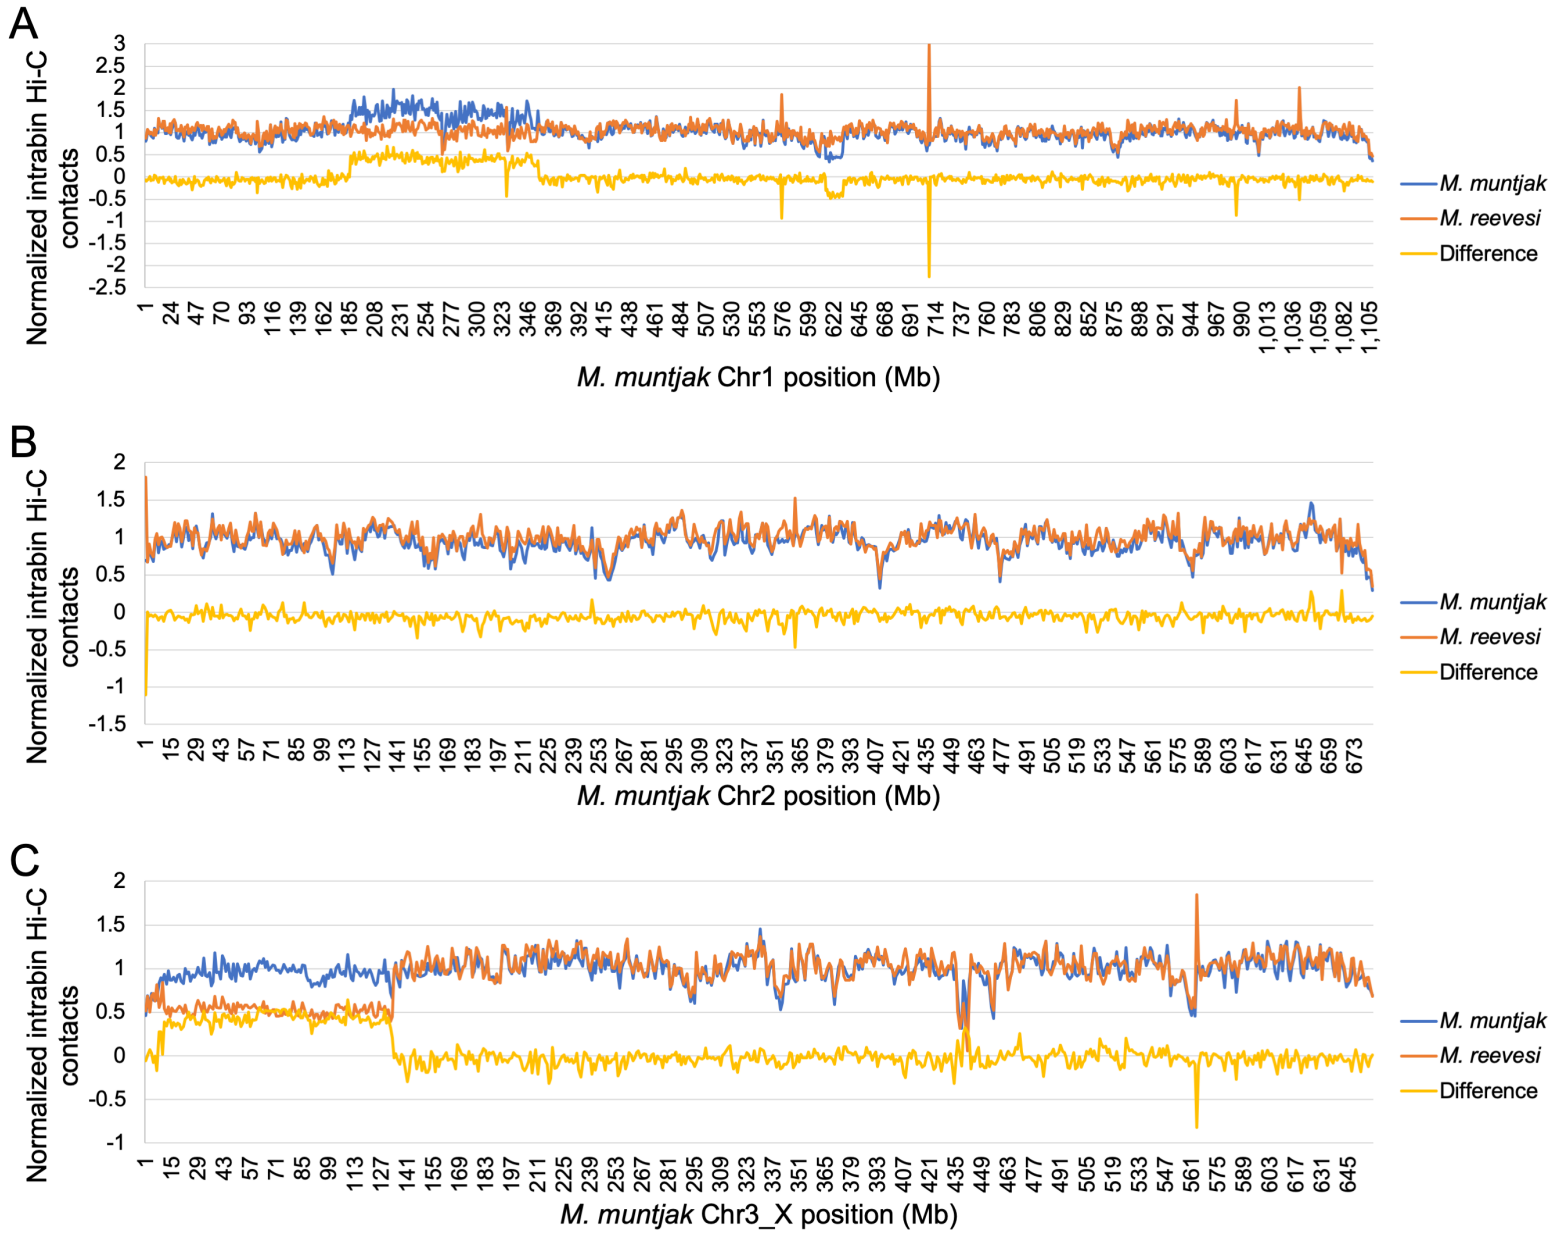

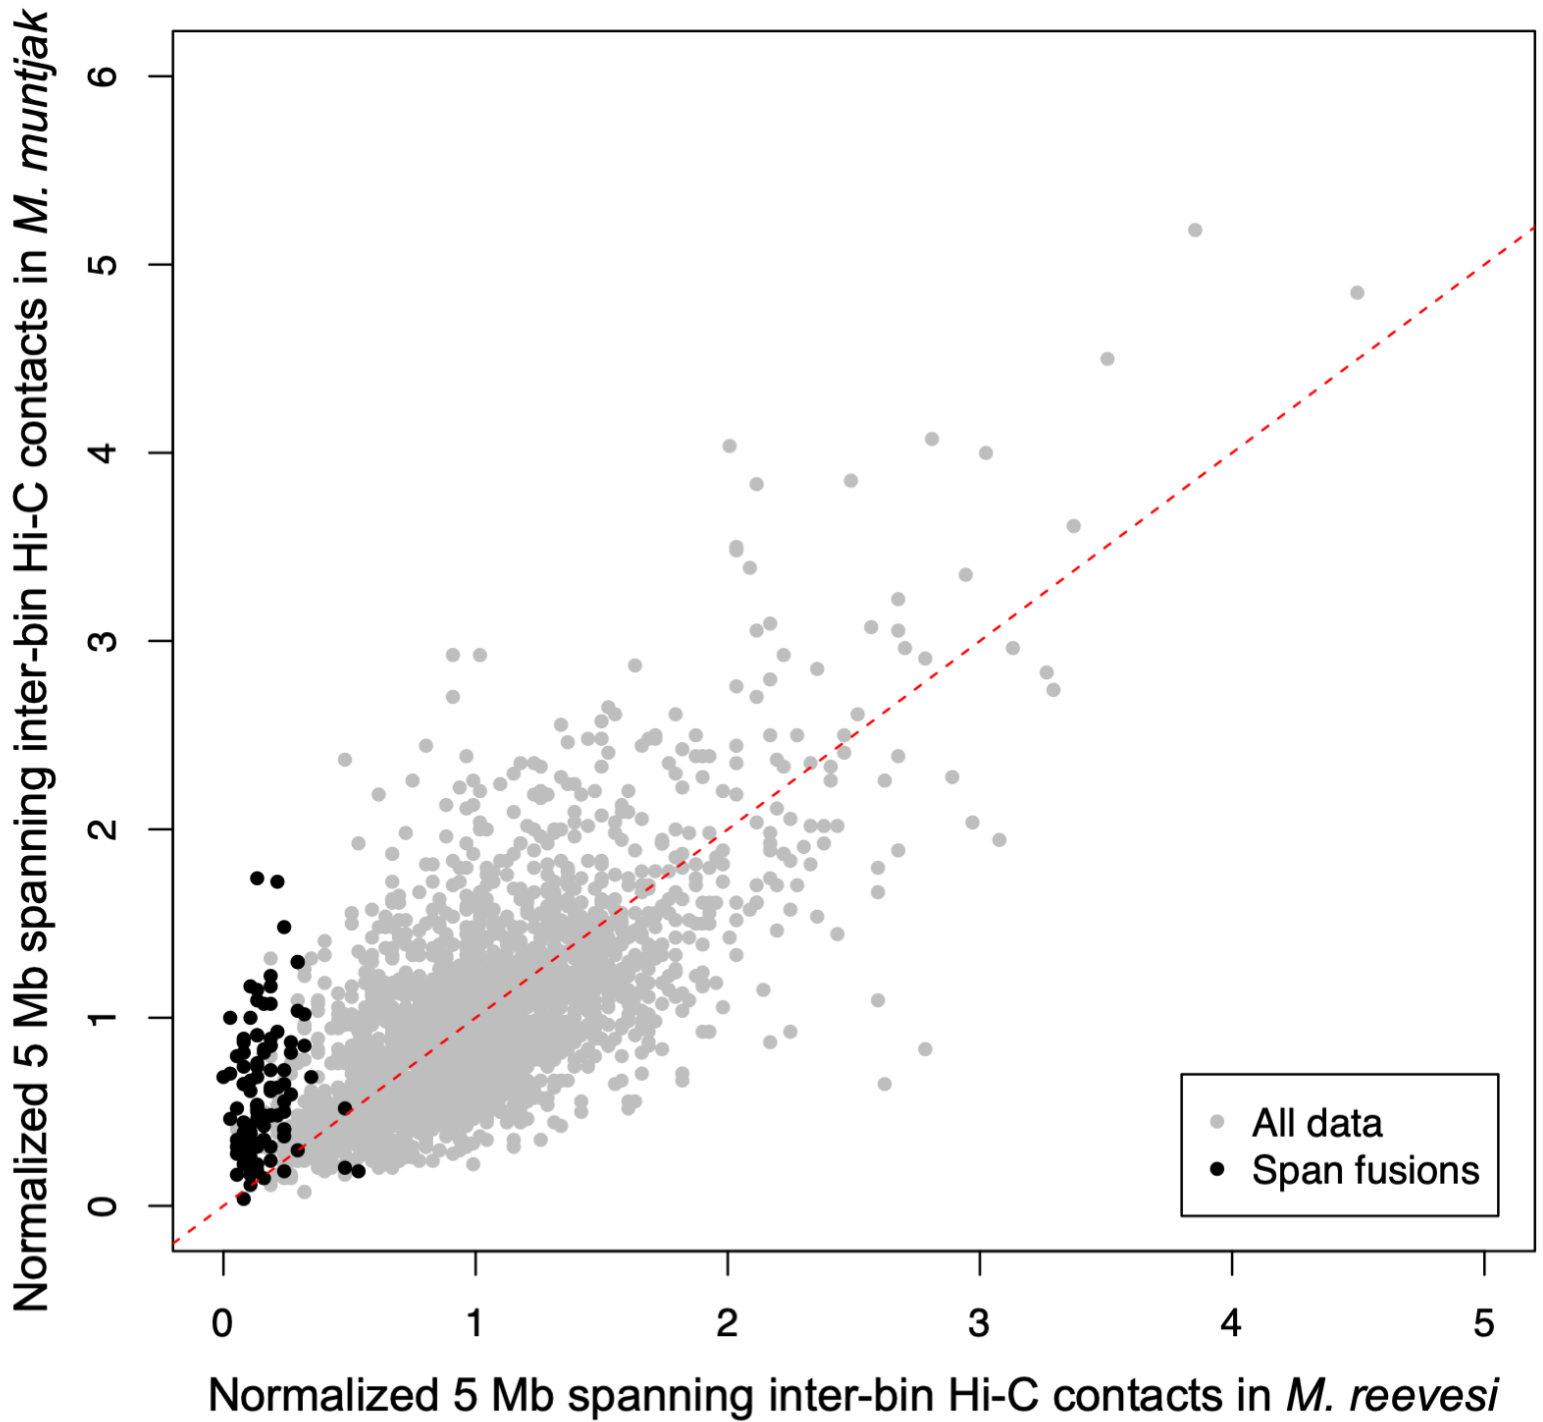

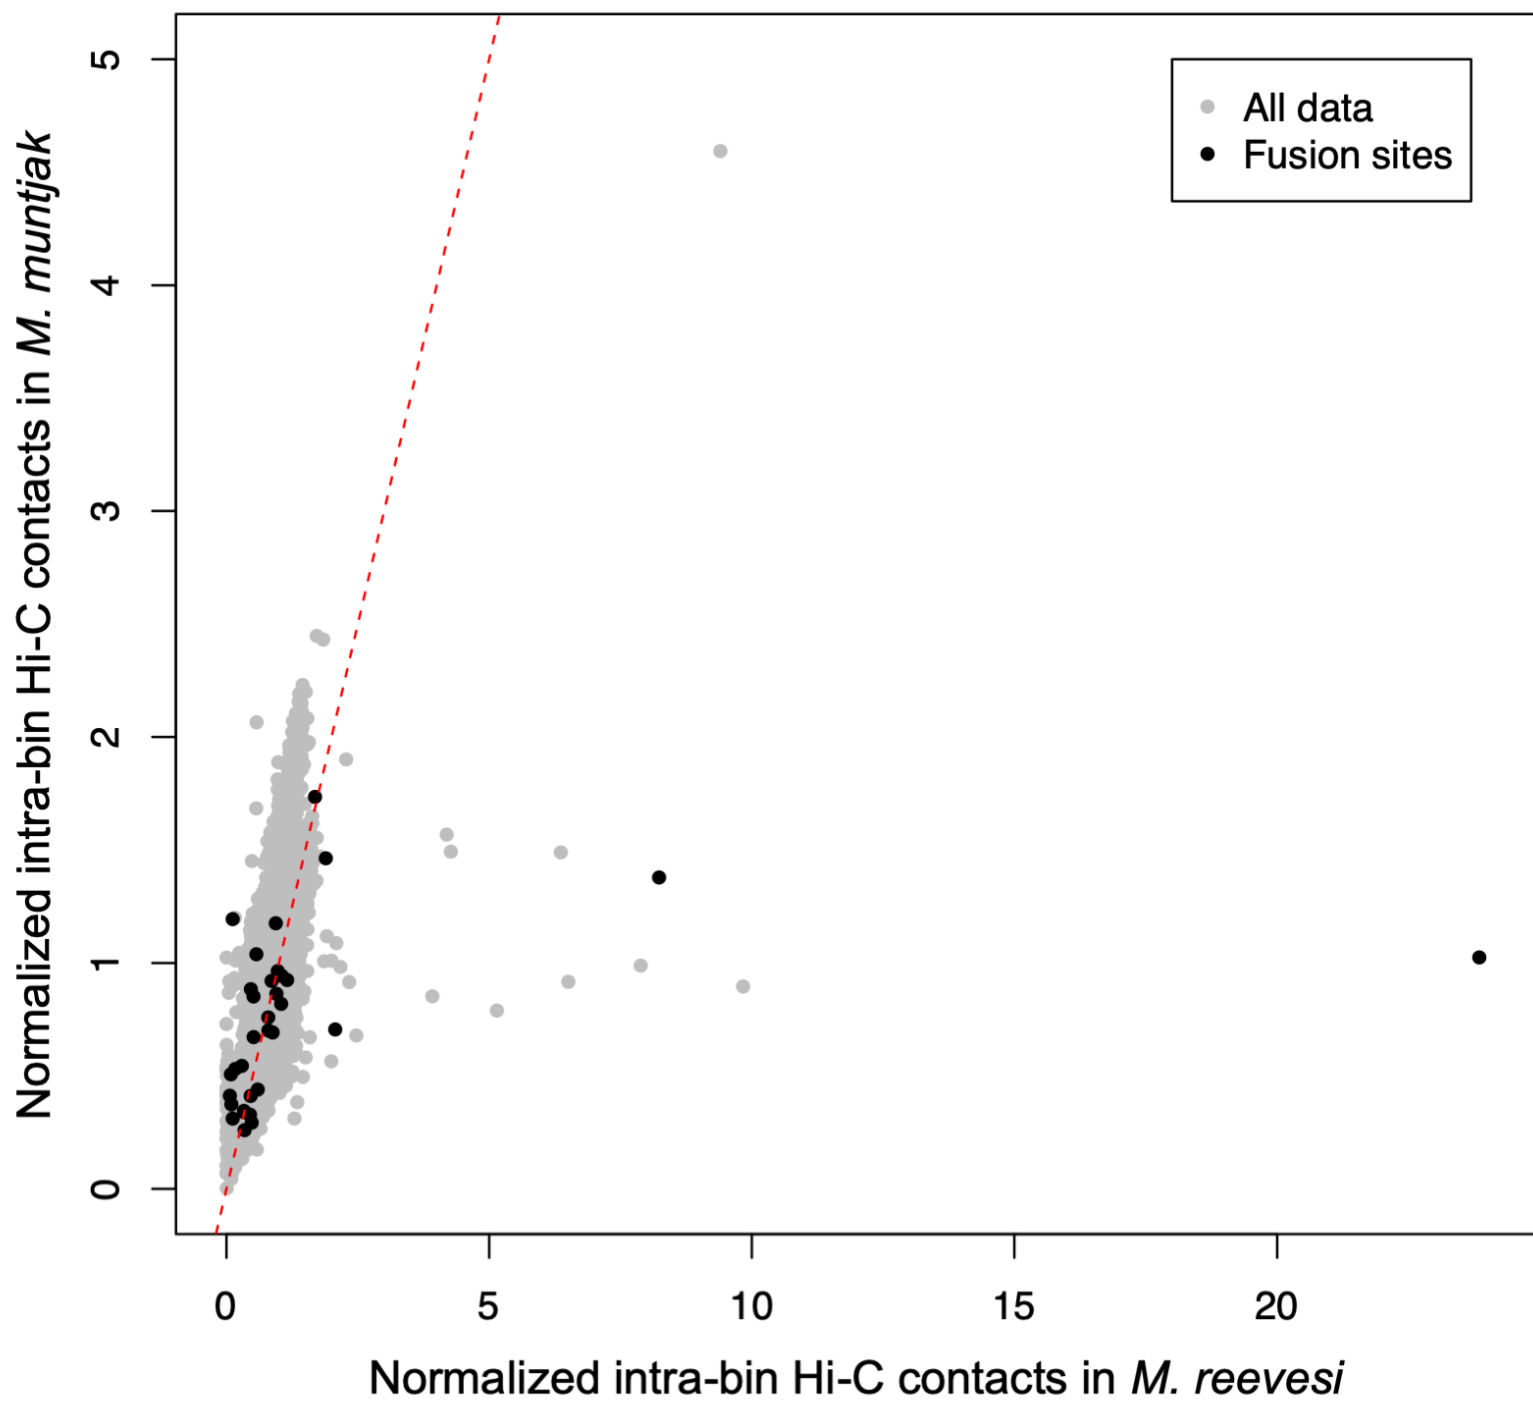

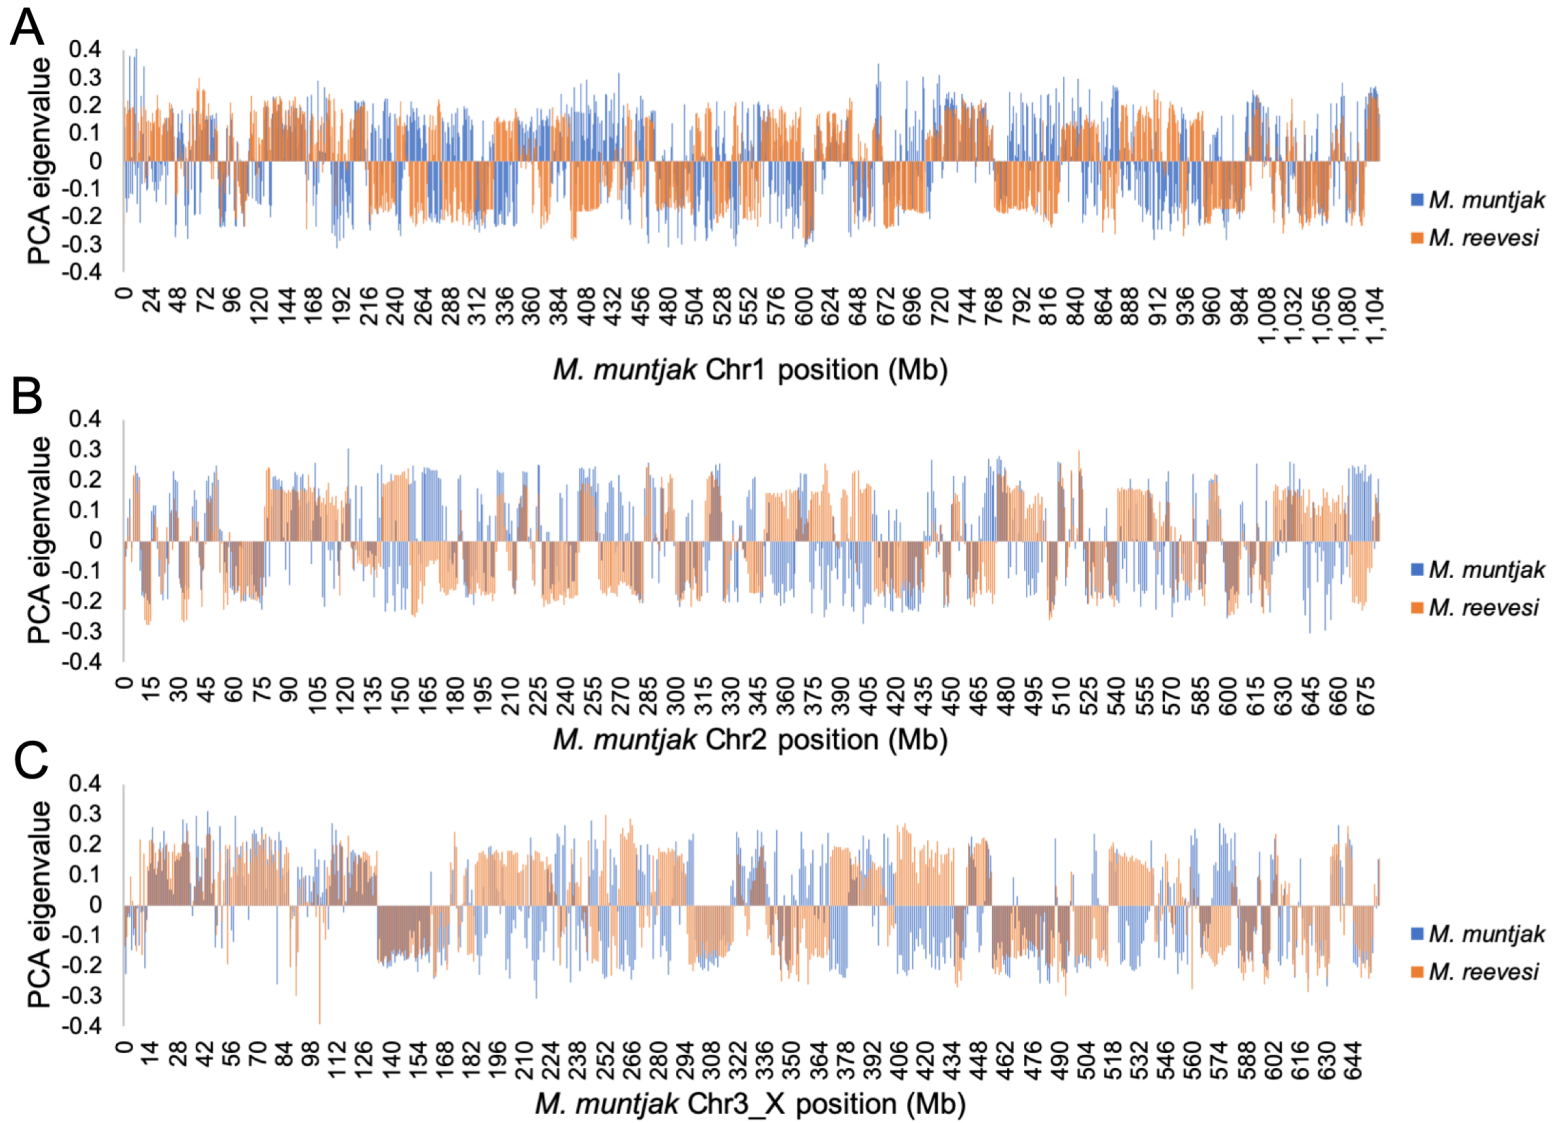

Figure S9
